# Supplementary material for: Improving the quality of the performance and delivery of continuous renal replacement therapy (CRRT) to critically ill patients across a healthcare system: QUALITY CRRT: a study protocol
Source: PubMed Central journal article supplement — BMJ Open. 2022 Feb 4;12(2):e054583. doi: 10.1136/bmjopen-2021-054583 (PMC8819828; doi:10.1136/bmjopen-2021-054583), 2022-02-04

# BMJ Open

BMJ Open is committed to open peer review. As part of this commitment we make the peer review history of every article we publish publicly available.

When an article is published we post the peer reviewers' comments and the authors' responses online. We also post the versions of the paper that were used during peer review. These are the versions that the peer review comments apply to.

The versions of the paper that follow are the versions that were submitted during the peer review process. They are not the versions of record or the final published versions. They should not be cited or distributed as the published version of this manuscript.

BMJ Open is an open access journal and the full, final, typeset and author-corrected version of record of the manuscript is available on our site with no access controls, subscription charges or pay-per-view fees (<http://bmjopen.bmj.com>).

If you have any questions on BMJ Open's open peer review process please email [info.bmjopen@bmj.com](mailto:info.bmjopen@bmj.com)

# BMJ Open

## Improving the quality of the performance and delivery of continuous renal replacement therapy (CRRT) to critically ill patients across a healthcare system – QUALITY CRRT

|                               |                                                                                                                                                                                                                                                                                                                                                                                                                                                                                                                                                                                                                                                                                                                                                                                                                                                                                                                    |
|-------------------------------|--------------------------------------------------------------------------------------------------------------------------------------------------------------------------------------------------------------------------------------------------------------------------------------------------------------------------------------------------------------------------------------------------------------------------------------------------------------------------------------------------------------------------------------------------------------------------------------------------------------------------------------------------------------------------------------------------------------------------------------------------------------------------------------------------------------------------------------------------------------------------------------------------------------------|
| Journal:                      | <i>BMJ Open</i>                                                                                                                                                                                                                                                                                                                                                                                                                                                                                                                                                                                                                                                                                                                                                                                                                                                                                                    |
| Manuscript ID                 | bmjopen-2021-054583                                                                                                                                                                                                                                                                                                                                                                                                                                                                                                                                                                                                                                                                                                                                                                                                                                                                                                |
| Article Type:                 | Protocol                                                                                                                                                                                                                                                                                                                                                                                                                                                                                                                                                                                                                                                                                                                                                                                                                                                                                                           |
| Date Submitted by the Author: | 21-Jun-2021                                                                                                                                                                                                                                                                                                                                                                                                                                                                                                                                                                                                                                                                                                                                                                                                                                                                                                        |
| Complete List of Authors:     | Opgenorth, Dawn; University of Alberta Faculty of Medicine & Dentistry, Department of Critical Care Medicine<br>Reil, Ellen; Alberta Health Services<br>Lau, Vincent; University of Alberta Faculty of Medicine & Dentistry, Department of Critical Care Medicine<br>Fraser, Nancy; Alberta Health Services, Critical Care Strategica Clinical Network<br>Zuege, Danny; Alberta Health Services, Critical Care Strategic Clinical Network; University of Calgary, Department of Critical Care Medicine<br>Wang, Xiaoming; Alberta Health Services<br>Bagshaw, Sean; University of Alberta Faculty of Medicine & Dentistry, Department of Critical Care Medicine; Alberta Health Services, Critical Care Strategic Clinical Network<br>Rewa, Oleksa; University of Alberta Faculty of Medicine & Dentistry, Department of Critical Care Medicine; Alberta Health Services, Critical Care Strategic Clinical Network |
| Keywords:                     | INTENSIVE & CRITICAL CARE, Dialysis < NEPHROLOGY, HEALTH SERVICES ADMINISTRATION & MANAGEMENT, Quality in health care < HEALTH SERVICES ADMINISTRATION & MANAGEMENT                                                                                                                                                                                                                                                                                                                                                                                                                                                                                                                                                                                                                                                                                                                                                |
|                               |                                                                                                                                                                                                                                                                                                                                                                                                                                                                                                                                                                                                                                                                                                                                                                                                                                                                                                                    |

SCHOLARONE™  
Manuscripts

# Improving the quality of the performance and delivery of continuous renal replacement therapy (CRRT) to critically ill patients across a healthcare system – QUALITY CRRT

Dawn Opgenorth<sup>1</sup>, Ellen Reil<sup>2</sup>, Vincent Lau<sup>1</sup>, Nancy Fraser<sup>3</sup>, Danny J Zuege<sup>3,4</sup>, Xiaoming Wang<sup>2</sup>, Sean M. Bagshaw<sup>1,3</sup>, Oleksa G. Rewa<sup>1,3</sup>

<sup>1</sup> Department of Critical Care Medicine, Faculty of Medicine and Dentistry, University of Alberta and Alberta Health Services

<sup>2</sup> Alberta Health Services

<sup>3</sup> Critical Care Strategic Clinical Network, Alberta Health Services

<sup>4</sup> Department of Critical Care Medicine, Cumming School of Medicine, University of Calgary and Alberta Health Services

## Corresponding Author

Oleksa G. Rewa

Assistant Professor

Department of Critical Care Medicine

University of Alberta

CSB 2-124 8440 112<sup>th</sup> St NW

Edmonton, Alberta

T6G 2B7

t. 780 263 3280

f. 780 492 1500

e. [rewa@ualberta.ca](mailto:rewa@ualberta.ca)

**Word Count 3605    Figures 0    Tables 5    Appendices 3**

**Keywords:** Critical Care Medicine; Intensive Care; Continuous Renal Replacement Therapy; Dialysis; Quality; Key Performance Indicators

**Trial Registration:** [clinicaltrials.gov](https://clinicaltrials.gov), NCT04221932, first posted 9 January 2020

**Protocol Version:** 1.0, June 15 2020

**Funding:** This work was supported by University of Alberta Hospital Fund grant number RES0040497 and Baxter Health Inc. Investigator Initiated Research grant number RES0044818.

## Abstract (235 words)

**Introduction:** Continuous Renal Replacement Therapy (CRRT) is a continuous form of dialysis used to support critically ill patients with acute kidney injury. The ideal delivery of CRRT requires ongoing monitoring and reporting to adjust practice and deliver optimal therapy.

However, this practice occurs variably.

**Methods:** QUALITY CRRT is a multi-center, prospective, stepped-wedged, interrupted time-series evaluation of the effectiveness, safety and cost of implementing a multi-faceted CRRT quality assurance and improvement program across an entire healthcare system. This study will focus on the standardization of CRRT programs with similar structure, process and outcome metrics by the reporting of CRRT Key Performance Indicators (KPIs). The primary outcome will be the quarterly performance of CRRT KPIs. Secondary outcomes will include patient-centered outcomes and economic outcomes. Analysis will compare pre- and post-implementation groups as well as for the performance of KPIs using an interrupted time-series methodology. The health economic evaluation will include a within-study analysis and a longer-term model-based analysis.

**Discussion:** The effective delivery of CRRT to critically ill patients ideally requires a standardized approach of best practice assessment and ongoing audit and feedback of standardized performance measures. QUALITY CRRT will test the application of this strategy stakeholder engagement and stepped-wedged implementation across an entire healthcare system.

**Ethics and Dissemination:** This study has received ethics approval. We will plan to publish the results in a peer-reviewed journal.

**Trial Registration:** clinicaltrials.gov, NCT04221932, first posted 9 January 2020.

## Strengths and Limitations

- **Quality CRRT involves the implementation of CRRT KPIs across an entire healthcare system**
- **Study includes pilot program followed by broader stepped-wedged roll out of CRRT KPIs across all ICUs performing CRRT**
- **Included CRRT KPIs informed from current evidence-base as well as stakeholder surveys**
- **Study limited to CRRT and does not include IRR**

## Introduction

Continuous renal replacement therapy (CRRT) is a continuous method of blood purification that provides slow uninterrupted clearance of uremic toxins and enables acid-base, electrolyte and volume homeostasis while preserving hemodynamic stability.[1, 2]

### **CRRT is the most common initial form of dialysis in ICU settings**

The recent epidemiological study, AKI-EPI, revealed that CRRT was the most common form of initial acute RRT for patients with severe AKI.[3] These patients have greater illness severity, are more likely to die and have significantly increased healthcare utilization when compared to their non-CRRT critically ill counterparts.[2] As our population ages, becomes more medically complex, and presents with greater severity of illness, the utilization of CRRT is likely to increase and become an increasingly vital component of life-sustaining therapy.[3]

### **CRRT is expensive but there are substantial opportunities to improve costs**

CRRT is a costly and labour intensive resource.[4] In the setting of increasingly constrained healthcare resources, intervention is needed which may identify and eliminate inefficiencies, improve performance, and decrease waste while improving provider satisfaction and achieving better patient outcomes.[5, 6] Currently, performance indicators for CRRT are not routinely measured, and as such, we are not in a position to understand or identify the inefficiencies or gaps in the quality of care of CRRT delivered to our sickest patients.[6]

### **Current CRRT practices are not standardized**

In our healthcare system, CRRT is delivered as per individual unit protocols and practice patterns and is not consistently monitored (i.e., initiation strategies, anticoagulation techniques, dose delivered, ultrafiltration, etc). Discrepancies from best practices and lack of standardization

1  
2  
3 of CRRT delivery can result in unplanned CRRT interruptions, decreased treatment time,  
4 inadequate dose delivery, and impaired clearance of toxic metabolites which can lead to  
5 worsened patient outcomes.[7, 8]  
6  
7

8  
9  
10 Such suboptimal practice variation may relate to the lack of well-developed key performance  
11 indicators (KPIs) for CRRT delivery and performance, and the associated audit and feedback  
12 function such KPIs can facilitate. KPIs are measures that can be used to monitor the performance  
13 of healthcare delivery.[9] They are necessary and can improve reliability of care, standardize  
14 complex interventions, and provide a platform to measure and monitor performance and the  
15 impact of practice changes.[10, 11]  
16  
17  
18  
19  
20  
21  
22  
23

24  
25 Recently, previous phases of work have identified and prioritized KPIs for CRRT care.[12, 13]  
26  
27 Implementing these CRRT KPIs may change practice to provide effective, validated and  
28 standardized CRRT.[12, 13] Though several previous programs of work have looked to  
29 implement these CRRT KPIs into clinical practice, but no program has rigorously tested the  
30 implementation of this structure and monitoring across an entire healthcare system.[14-16]  
31  
32  
33  
34  
35  
36  
37  
38  
39  
40

## 41 **Objectives and Research Questions:**

### 42 **Primary Objective**

43  
44 The primary objective is to improve the quality of care delivered to critically ill patients  
45 receiving CRRT in Alberta, as measured by CRRT KPI performance.  
46  
47  
48  
49

### 50 **Secondary Objectives**

51  
52 These will include patient centered outcomes (i.e., ICU mortality and length of stay, duration of  
53  
54  
55  
56  
57  
58  
59  
60

1  
2  
3 CRRT therapy, 90-day renal recovery) and cost of health services, including unit specific CRRT  
4  
5 costs.  
6  
7

### 8 9 **Research Hypotheses:**

- 10  
11  
12 1. Can we improve the performance of CRRT programs through the implementation of  
13  
14 evidence-based clinical practice guidelines and provision of targeted multi-faceted CRRT  
15  
16 audit, feedback and education sessions?  
17  
18  
19 2. Will the implementation of standardized CRRT programs our healthcare system's ICUs  
20  
21 result in decreased healthcare systems costs?  
22  
23  
24  
25 3. What is the impact of a multi-faceted quality assurance and improvement program on the  
26  
27 efficacy and safety of care in critically ill patients requiring CRRT across our healthcare  
28  
29 system?  
30  
31  
32  
33  
34

## 35 **Methods**

### 36 37 **Trial Design**

38  
39 The QUALITY CRRT trial is a pragmatic, multi-center, population-level, stepped-wedged,  
40  
41 interrupted time series evaluation of the implementation of an evidence-based CRRT quality  
42  
43 assurance and improvement program to standardize the delivery of CRRT in the 15 adult  
44  
45 general and cardiac ICUs and 3 pediatric ICUs in our healthcare system that provide CRRT  
46  
47 (Table 1). It conforms with the SPIRIT Checklist for study protocols (see Appendix 1).  
48  
49  
50

### 51 **Trial Oversight**

52  
53  
54  
55  
56  
57  
58  
59  
60



1  
2  
3 QUALITY CRRT will be led by a small but specialized Steering Committee whose members  
4 bring extensive experience with CRRT programs and clinical leadership, implementation science  
5 and healthcare systems research. This pan-provincial team will be based at the University of  
6 Alberta Hospital and will include representation from the Critical Care Strategic Network of  
7 Alberta Health Services (the provincial body which provides provincial liaison, networking and  
8 coordination of adult and pediatric critical care in Alberta).[17] The Steering Committee will be  
9 responsible for program management, development and implementation of minimum standards  
10 for CRRT programs, KPI reporting, targeted education and overall trial management.  
11  
12  
13  
14  
15  
16  
17  
18  
19  
20  
21  
22  
23

## 24 **Patient and Public Involvement**

25  
26 While this study currently does not directly include patients in its design, the Critical Care  
27 Strategic Clinical Network includes patient representatives on its core committee and is  
28 represented on the study team. The study objectives and research hypotheses have been  
29 developed along with these members. Finally, the results of this study will be disseminated to  
30 patients and families leveraging the strengths of the Critical Care Strategic Clinical Network  
31 through online resources, publications and public engagement events (i.e., Café Scientifiques).  
32  
33  
34  
35  
36  
37  
38  
39  
40  
41  
42

## 43 **Population and Eligibility**

44  
45 This study will be conducted at all ICUs in Alberta capable of providing CRRT. All subjects in  
46 this study will be critically ill patients (i.e., pediatric and adult) receiving CRRT as part of their  
47 care. There will be no exclusion criteria. The inclusion criteria are purposely broad in scope to  
48 capture a systems level sample of critically ill patients where new monitoring and policy may  
49 be implemented, and outcomes measured on a population-based level.  
50  
51  
52  
53  
54  
55  
56  
57  
58  
59  
60

1  
2  
3 All new ICU admissions receiving CRRT in the 15 adult and 3 pediatric ICUs in Alberta who  
4 provide this therapy will be included in this project. In 2019, there were 12,132 adult and 1,592  
5 pediatric admissions per year with 5.6% and 1.4% of these patients (i.e., 680 adult and 22  
6 pediatric patients) receiving CRRT. As this study will be conducted over a 4-year period, thus  
7 data on approximately 3,000 adult and pediatric (i.e., 2900 adult and 100 pediatric) patients will  
8 be included in this project.  
9  
10  
11  
12  
13  
14  
15  
16  
17

### 18 **Interventions, duration and frequency of follow-up**

19  
20 The project consists of a 24-month baseline phase to measure current CRRT practice and a 24-  
21 month intervention phase to implement a standardized CRRT program targeting ICUs-based  
22 CRRT KPIs and monitor performance and compliance of participating sites. Data from the 24-  
23 month intervention phase will be used to model long-term health economic outcomes.  
24  
25  
26  
27  
28  
29

### 30 **Baseline Phase**

31  
32  
33 Baseline data collection: baseline clinical and resource utilization data will be collected on all  
34 patients having received receiving CRRT between November 1, 2017 and October 31, 2019.  
35  
36

37  
38 Stakeholder survey: A healthcare system-wide survey of care providers and stakeholders at  
39 participating ICUs will be conducted to identify and establish agreement on the most appropriate  
40 KPIs to measure at their ICU during the intervention phase. The survey will be administered  
41 through Survey Monkey ([www.surveymonkey.com](http://www.surveymonkey.com)).  
42  
43  
44  
45  
46

### 47 **Intervention Phase**

48  
49  
50 KPI benchmark reporting: The primary study intervention will be the implementation of audit  
51 and feedback on CRRT KPI benchmarks identified by the individual ICU teams in the baseline  
52 survey. We will implement a minimal bundle of potential CRRT KPIs with evidence to measure  
53  
54  
55  
56  
57  
58  
59  
60

1  
2  
3 will include CRRT program structure, filter life, downtime, delivered dose, ultrafiltration  
4 achieved, alarms, adverse events, ICU mortality and renal recovery (Table 2).[6, 12, 13]  
5  
6 Reports will be implemented and reviewed with ICU stakeholders ad hoc and at quarterly  
7  
8 intervals.  
9  
10

11  
12 Prior to implementation of the reports, each ICU will receive multi-faceted education strategies  
13 tailored to their site and informed by local CRRT leaders, champions and stakeholders (Table  
14  
15 3). Education strategies will include, 1) inter-professional grand rounds, seminars and webinars  
16 supported by a web-based information repository, 2) identification of site champions to provide  
17 onsite advocacy and education. The intervention will be multidisciplinary, targeting CRRT  
18 prescribers, nurses, unit operational leaders and educators. After the intervention is  
19 implemented quarterly audit and feedback reports and quarterly tele/videoconference and/or in-  
20 person visits will be conducted to support the ICUs. The content of this feedback and methods  
21 will be individualized to individual ICU needs and preferences.  
22  
23  
24  
25  
26  
27  
28  
29  
30  
31  
32

33  
34 While the initial education strategy will contain similar themes across all sites, each site will be  
35 encouraged to facilitate and participate with our working group in their own audit and  
36 educational activities to address unit specific shortcomings in their CRRT KPI performance. A  
37 central website repository of troubleshooting tools that will be hosted by the Critical Care  
38 Strategic Network of Alberta Health Services will be available for sites who are not achieving  
39 KPI benchmarks.  
40  
41  
42  
43  
44  
45  
46

47  
48 The CRRT KPI reporting program will be implemented in a stepped fashion with a pilot  
49 occurring at the GSICU at the UAH over a 3-month period to ensure feasibility, proper  
50 reporting and compliance. This will lead to optimization of the tools prior to more generalized  
51 use. The pilot will be followed by a stepped-wedge roll out at centers across Alberta over the  
52  
53  
54  
55  
56  
57  
58  
59  
60

subsequent 12 months.

Intervention data collection: At the end of the intervention phase, clinical and resource utilization data will be collected on all patients receiving CRRT during the 24-month intervention period (Table 4).

## Outcomes

### Primary Outcome

The primary endpoint measures are quarterly changes in the performance of the CRRT process

KPIs:

- Average filter lifespan, measured in hours
- Downtime, as percentage of prescribed time
- Delivered dose, as a percentage of prescribed dose
- Ultrafiltration achieved, as a percentage of prescribed ultrafiltration
- Alarms as recorded per machine, per day

### Secondary Outcomes

Patient centered

- Mortality - ICU, hospital, 90-day post discharge
- Length of stay - ICU and hospital
- Duration of CRRT treatment in hours
- Renal recovery 90-days post ICU discharge

Health economic

- Supply costs - dialysis filters, fluids, dialysis catheters

- Medication costs – anticoagulation, renal specific replacement medications (e.g. erythropoietin analogues, calcium binders, etc.)
- Health care worker costs – physician billing, nursing (hrs)
- ICU and hospital stay costs (length of stay)
- Progression to end stage renal disease - projected chronic dialysis costs
- Quality of life adjusted years (QALYs)
- Health-related Quality of Life (HRQoL)
- Total health care costs

### **Data Management**

Data elements will include patient centered variables: (i.e., demographics, type of admission [medical, surgical, trauma]), clinical characteristics (i.e., comorbid diseases, primary diagnosis), illness severity (i.e., APACHE II, Sequential Organ Failure Assessment [SOFA], Clinical Frailty Score [CFS]), treatment intensity (i.e., duration of renal replacement therapy, mechanical ventilation, vasoactive therapy), ICU and hospital lengths of stay, and outcomes (i.e., renal recovery, mortality, HRQoL); and CRRT associated cost data: (i.e., filter use, prescription/dose, machine alarms/down time, coagulation, adverse events, re-hospitalizations, progression of renal disease). A schedule of data variables to be captured is summarized in Appendix 2.

Data sources will include TRACER and Enterprise data repository, AHS Data Integration, Management and Reporting (DIMR) administrative databases, the Nephrology Information System (NIS), the Patient based Renal Information System (PARIS) and Baxter Healthcare Inc.[18]

1  
2  
3 All study documents will be kept in a locked filing cabinet in a locked office, and computer files  
4  
5 will be encrypted and stored on a secure network for 5 years following completion of the study.  
6  
7

### 8 9 **Co-Enrollment**

10  
11 QUALITY CRRT is a pragmatic, real world, quality improvement and assurance program. Due  
12  
13 to the healthcare systems scope of the program, there are no patient-level interventions.  
14

15 Accordingly, there will be no limitations to co-enrollment or specific patient or clinician  
16  
17 practices.  
18  
19

### 20 21 22 **Statistical Analyses**

23  
24 Analysis will be conducted between the pre- and post-implementation groups. Analyses of the  
25  
26 primary and secondary outcomes will involve summary measures obtained by aggregating the  
27  
28 endpoints. Analyses will be performed using SAS Enterprise Guide 7.1 (Cary, North  
29  
30 Carolina, USA). Baseline comparisons will be performed using chi-squared test for equal  
31  
32 proportions with results to be reported as frequencies with percentages. Continuous normally  
33  
34 distributed variables will be compared using t-tests and reported as means with standard  
35  
36 deviation, while non-parametrically distributed will be compared using Wilcoxon rank sum  
37  
38 tests and reported as medians and interquartile ranges (IQRs). In case of small sample size,  
39  
40 Fisher's exact test will be used.  
41  
42  
43  
44  
45

46  
47 Interrupted time series (ITS) analyses using autoregressive integrated moving average  
48  
49 (ARIMA) models will be employed for important risk factors to account for temporal trends  
50  
51 and to determine whether there were changes in the clinic outcomes at the intervention period  
52  
53 (compared with the baseline period) and associated with implementation of the evidence-based  
54  
55  
56  
57  
58  
59  
60

1  
2  
3 acute RRT pathway.  
4  
5

6 Cost-effectiveness or net-benefit (investment-return) analysis using a decision tree will be  
7  
8 adopted to compare return (or benefit, B) and investment (or cost, C) of the evidence-based  
9  
10 RRT pathway. Reduction of healthcare systems costs including inpatient services (length of  
11  
12 stay of primary admission, number of readmissions, and readmission LOS), outpatient services  
13  
14 (emergency room visits, and clinic visits), physician services (specialist visits, and general  
15  
16 practitioner visits), and ongoing new end-stage renal disease will be estimated based on  
17  
18 generalized linear models. Cost-effectiveness will be analyzed by estimating incremental cost  
19  
20 and effectiveness based on quality-adjusted life years (QALYs) gained. QALYs will be  
21  
22 calculated based on health-related quality of life as measured by the 5Q-5D-5L and SF-36 in  
23  
24 adults and the PedsQL in children.  
25  
26  
27  
28

### 29 **Performance of CRRT KPIs**

30  
31  
32 Our primary outcome will be the iterative performance of selected CRRT KPIs. Based on prior  
33  
34 work, KPIs might include filter life (measured in hours), delivered dose (measured in  
35  
36 mL/kg/hr), downtime (measured in percentage of time), ultrafiltration realized (measured in  
37  
38 percentage of prescribed) and access alarms (measured in total number per day). We will aim  
39  
40 to both compare the performance of these KPIs to historical controls, as well as prospectively  
41  
42 through an interrupted time-series analysis. The interrupted time-series analysis will allow us  
43  
44 to follow variable changes over time, allow for assessment of gradual change, and is consistent  
45  
46 with traditional quality improvement initiatives.  
47  
48  
49  
50

### 51 **Patient-Centered Outcomes Analysis**

52  
53 The patient-centered outcome analysis will include ICU, hospital and 90-day mortalities, ICU  
54  
55 and hospital lengths of stay, duration of CRRT treatment, and renal recovery measured at 90-  
56  
57  
58  
59  
60

1  
2  
3 days months. While this study is not designed to evaluate the effect that the implementation of  
4 the reporting of CRRT KPIs will have on mortality, lengths of treatment and stay or renal  
5 recovery, these are important patient-centered outcomes that will need to be considered as  
6 balancing measures for CRRT KPI reporting and implementation of our multi-faceted  
7 knowledge translation intervention.  
8  
9  
10  
11  
12  
13

### 14 **Health Economic Evaluation**

15  
16 The economic evaluation will comprise two parts: 1) a within-study analysis, and 2) a longer-  
17 term, model-based analysis.  
18  
19

20  
21 The within-study analysis will focus on costs and outcomes collected during the study period. It  
22 will include total quarterly unit-specific CRRT-associated costs following the implementation  
23 of the CRRT KPI reporting program. This endpoint will be determined from our provincial CIS  
24 and Alberta Blue Cross databases. Specifically, we will evaluate and compare the 1) costs of  
25 supplying CRRT filters, 2) costs of CRRT fluids, 3) cost of CRRT anticoagulation and, 4) costs  
26 and utilization of dialysis catheters. Costs will be calculated in part using CRRT process  
27 measures captured by our CRRT KPIs (i.e., filter life and number of filters used,  
28 anticoagulation modality, dose delivered, and effluent used, etc.). CRRT-associated costs were  
29 selected as an important secondary outcome as these will be most immediately affected with the  
30 implementation of the CRRT KPI quality assurance program across unit.  
31  
32  
33  
34  
35  
36  
37  
38  
39  
40  
41  
42  
43  
44  
45

46 We will also determine healthcare systems costs to include total ICU and hospital stay  
47 associated costs, ongoing new end-stage renal disease (i.e., chronic RRT) costs, total healthcare  
48 costs, and outcomes [ mortality, quality-adjusted life years (QALY)]. Modelling analysis will  
49 provide cost estimates from both a healthcare system and societal perspective (capturing costs  
50 to the health service, social care providers and patients). Results will be reported as the  
51  
52  
53  
54  
55  
56  
57  
58  
59  
60



1  
2  
3 incremental net benefit and incremental cost-effectiveness ratios. Uncertainty will be captured  
4  
5 in the analyses through probabilistic sensitivity analysis and reported using cost-effectiveness  
6  
7 acceptability curves, showing the likelihood the intervention will be cost-effective over a range  
8  
9 of values of willingness-to-pay for specific outcomes.  
10  
11

### 12 **Planned Subgroup Analyses**

13  
14 Pre-specified subgroup analysis will include ICU patients to 1) adult vs. pediatric, 2) female vs.  
15  
16 male, 3) academic vs. community ICUs, 4) cardiovascular ICUs vs. medical/surgical ICUs, 5)  
17  
18 high volume vs. low volume centers (i.e., as per quartiles) 6) patients requiring acute RRT vs.  
19  
20 those on chronic dialysis. Adult, pediatric, female and male patients are fundamentally different  
21  
22 patient populations and deserve specific study.  
23  
24

25  
26  
27 Cardiovascular ICU patients differ from general medical/surgical patients as often these  
28  
29 patients are immediately post-operative, have a specific timing of insult (i.e., cardiac surgery)  
30  
31 and hence have different pathophysiology related to their critical illness. It is important to  
32  
33 delineate academic vs. community ICUs as, for mechanically ventilated patients (i.e., another  
34  
35 form of critical life-sustaining therapy) with acute respiratory distress syndrome (ARDS),  
36  
37 mortality rates differ significantly.[19] Finally, higher ARDS hospital case volume has also  
38  
39 been associated with lowers ARDS hospital mortality and it will be important to determine if  
40  
41 this association is present in CRRT.[20] We will perform the above analyses for health  
42  
43 economic evaluations, patient and process of care measures to include our pre-specified  
44  
45 primary and secondary outcomes for each subgroup. Each analysis will be accompanied by a  
46  
47 test for interaction between treatment and subgroup to ascertain whether effects differ  
48  
49 significantly between subgroups.  
50  
51  
52  
53  
54

### 55 **Ethics Approval and Consent to Participate**

1  
2  
3 This project is an evaluation of impact of a multi-faceted CRRT quality assurance and  
4 improvement program on patient outcomes and health care resource utilization in Alberta ICUs  
5 delivering CRRT. All diagnostic and management strategies are within standard of care and all  
6 data with relevance to the project are already routinely captured as part of standard patient care  
7 by means of machine specific data cards or clinical charting. No added trial-specific  
8 investigations or clinical documentation is required.  
9

10  
11  
12 This evaluation was reviewed by the University of Alberta Health Research Ethics Board  
13 (HREB) (Pro00075274 January 22, 2020) and a waiver of consent was granted based on the  
14 premise this project represents health services implementation and evaluation compatible with a  
15 quality assurance and improvement initiative (see Appendix 3).  
16

17 Any protocol modifications will be submitted to the appropriate relevant parties.  
18  
19

## 20 21 22 **Dissemination**

23 The findings of QUALITY CRRT will directly inform and guide policy on establishing  
24 evidence-based best-practices guidelines for delivering CRRT in Alberta ICUs. In addition,  
25 establishing evidence-based benchmarks across the entire health care system will enable  
26 systematic evaluation of CRRT performance. These outcomes will help create a framework for  
27 the standardization of CRRT programs across Alberta and other jurisdictions providing CRRT.  
28 (Table 2).  
29

30 Alberta's comprehensive ICU clinical information and analytics infrastructure (Connect Care,  
31 eClinical TRACER) will be leveraged to implement a CRRT Quality Dashboard, accessible to  
32 all Alberta ICU practitioners. The dashboard will contain statistics on KPI benchmarks to  
33 provide real-time feedback on individual ICUs performance in delivering CRRT.  
34  
35  
36  
37  
38  
39  
40  
41  
42  
43  
44  
45  
46  
47  
48  
49  
50  
51  
52  
53  
54  
55  
56  
57  
58  
59  
60

1  
2  
3 A central website containing a summary of CRRT guidelines and best practices and a repository  
4 of troubleshooting tools on attaining KPI benchmarks will be developed and made available to  
5  
6 all Alberta CRRT practitioners.  
7  
8  
9

10 We are proposing to publish the study results. Further, this work will be presented at local,  
11 provincial and national critical care and nephrology meetings. Finally, QUALITY CRRT will  
12 serve as the basis for a broader program of work, DIALYZING WISELY, which will aim to  
13 transform the fashion in which acute dialysis is conducted in Alberta.  
14  
15  
16  
17  
18  
19  
20  
21  
22

## 23 Discussion

24  
25 The importance of the quality and management for critically ill patients with acute kidney injury  
26 requiring CRRT has been previously recognized.[5, 6] Previous studies have focused on single  
27 unit or individual hospital-level quality improvement and assurance interventions (Table 5).[14-  
28 16] Griffin et al., first conducted such a quality improvement study at the University of Colorado  
29 Hospital where they assessed the magnitude in variability in CRRT dosing. They followed  
30 specific implementation that included optimizing their electronic medical record to calculate  
31 CRRT dosing in real-time to then comment on dosing and provide guidance and education in  
32 order to better adhere to national guidelines. This led to the doubling of the rate of appropriate  
33 CRRT dosing, and reduction in variability.[14] Mottes et al., at the University of Cincinnati  
34 Children's Hospital, created a 'CRRT Dashboard' which tracked important KPIs such as 'filter  
35 life,' 'mean prescription dose,' and 'fluid balance,' and found that this platform provided a  
36 significant means for measuring adherence to robust standards on the delivery of CRRT,  
37 specifically in the process of care.[15] Finally, most recently a group from the University of  
38 Kentucky Medical Centre reported the development, implementation, and subsequent outcomes  
39  
40  
41  
42  
43  
44  
45  
46  
47  
48  
49  
50  
51  
52  
53  
54  
55  
56  
57  
58  
59  
60

1  
2  
3 associated with a quality assurance system to support the provision of CRRT in the ICU.[16]  
4  
5 This was the largest program to date, numbering 1185 adult patients on CRRT over a 34-month  
6  
7 period. Using the monitoring of evidence-based KPIs and targeted education, they doubled the  
8  
9 appropriate use of citrate-based anticoagulation, improved the appropriateness of CRRT-dosing,  
10  
11 increased filter life while decreasing machine alarms and maintaining similar CRRT duration and  
12  
13 patient mortality while reducing CRRT-costs. While these programs demonstrate that the  
14  
15 implementation of evidence-derived KPI-based CRRT quality assurance programs are effective  
16  
17 in improving the efficiency and quality of CRRT, none of these programs have sought to do this  
18  
19 on an entire healthcare systems level. QUALITY CRRT will build on the experience of these  
20  
21 programs in order to scale such a quality improvement and assurance initiative across a  
22  
23 provincial health system of ICUs which provide CRRT.  
24  
25  
26  
27  
28  
29  
30

### 31 **Strengths & Limitations**

32  
33 While QUALITY CRRT focuses on standardizing CRRT programs across an entire provincial  
34  
35 healthcare system by ensuring a robust framework is in place and the monitoring of CRRT  
36  
37 performance and delivery occurs, this is limited to only continuous RRT. Intermittent RRT can  
38  
39 also occur in the acute setting for critically ill patients in the ICU. Accordingly, the experience  
40  
41 and infrastructure realized in QUALITY CRRT will pave the work for additional critical care  
42  
43 nephrology programs aimed at improving all forms acute RRT (i.e., continuous and intermittent)  
44  
45 in the ICU.  
46  
47  
48  
49  
50  
51

### 52 **Contributorship Statement**

1  
2  
3 SMB and OGR were responsible for the conception, design and planning of this study. XW and  
4  
5 VL were responsible for data analysis and interpretation of the data. All authors were part of  
6  
7 reporting and drafting of this manuscript.  
8  
9  
10

### 11 12 **Competing Interests**

13  
14 Drs. SBM and OGR have received honoraria from Baxter Healthcare Inc.

15  
16 The study sponsors had no role in protocol development, trial management or data analysis and  
17  
18 reporting.  
19  
20  
21  
22

### 23 24 **Funding**

25  
26 QUALITY CRRT was supported by University of Alberta Hospital Fund grant number

27  
28 RES0040497 and Baxter Health Inc. Investigator Initiated Research grant number RES0044818.  
29  
30  
31  
32  
33  
34  
35  
36  
37  
38  
39  
40  
41  
42  
43  
44  
45  
46  
47  
48  
49  
50  
51  
52  
53  
54  
55  
56  
57  
58  
59  
60

## References:

1. Rewa O, Bagshaw SM: **Acute kidney injury-epidemiology, outcomes and economics.** *Nat Rev Nephrol* 2014, **10**(4):193-207.
2. Rewa O, Mottes T, Bagshaw SM: **Quality measures for acute kidney injury and continuous renal replacement therapy.** *Curr Opin Crit Care* 2015, **21**(6):490-499.
3. Hoste EA, Bagshaw SM, Bellomo R, Cely CM, Colman R, Cruz DN, Edipidis K, Forni LG, Gomersall CD, Govil D *et al*: **Epidemiology of acute kidney injury in critically ill patients: the multinational AKI-EPI study.** *Intensive Care Med* 2015, **41**(8):1411-1423.
4. Lau D, Pannu N, James MT, Hemmelgarn BR, Kieser TM, Meyer SR, Klarenbach S: **Costs and consequences of acute kidney injury after cardiac surgery: A cohort study.** *J Thorac Cardiovasc Surg* 2020.
5. Kashani K, Rosner MH, Haase M, Lewington AJP, O'Donoghue DJ, Wilson FP, Nadim MK, Silver SA, Zarbock A, Ostermann M *et al*: **Quality Improvement Goals for Acute Kidney Injury.** *Clin J Am Soc Nephrol* 2019, **14**(6):941-953.
6. Rewa OG, Tolwani A, Mottes T, Juncos LA, Ronco C, Kashani K, Rosner M, Haase M, Kellum J, Bagshaw SM: **Quality of care and safety measures of acute renal replacement therapy: Workgroup statements from the 22nd acute disease quality initiative (ADQI) consensus conference.** *J Crit Care* 2019, **54**:52-57.
7. Tseng J, Halbert RJ, Minissian N, Rodriguez H, Barathan S, Hain P, Alban RF: **Association of Standardization of Continuous Renal Replacement Therapy and High-Value Care: An Evidence-Based Approach.** *Standardization of Continuous Renal Replacement Therapy and High-Value Care Letters. JAMA Internal Medicine* 2018, **178**(4):572-573.
8. Connor MJ, Jr., Karakala N: **Continuous Renal Replacement Therapy: Reviewing Current Best Practice to Provide High-Quality Extracorporeal Therapy to Critically Ill Patients.** *Adv Chronic Kidney Dis* 2017, **24**(4):213-218.
9. Shen B, Xu J, Wang Y, Jiang W, Teng J, Ding X: **Continuous Renal Replacement Therapy Quality Control and Performance Measures.** *Contrib Nephrol* 2018, **194**:134-145.
10. Resar R, Griffin F, Haraden C, TW N: **Using Care Bundles to Improve Health Care Quality.** *IHI Innovation Series white paper* 2012.
11. Rosner MH: **Ensuring Quality of Care through Monitoring of Continuous Renal Replacement Therapies.** *Contrib Nephrol* 2018, **194**:126-133.
12. Rewa OG, Villeneuve PM, Lachance P, Eurich DT, Stelfox HT, Gibney RTN, Hartling L, Featherstone R, Bagshaw SM: **Quality indicators of continuous renal replacement therapy (CRRT) care in critically ill patients: a systematic review.** *Intensive Care Med* 2017, **43**(6):750-763.
13. Rewa OG, Eurich DT, Noel Gibney RT, Bagshaw SM: **A modified Delphi process to identify, rank and prioritize quality indicators for continuous renal replacement therapy (CRRT) care in critically ill patients.** *J Crit Care* 2018, **47**:145-152.
14. Griffin BR, Thomson A, Yoder M, Francis I, Ambruso S, Bregman A, Feller M, Johnson-Bortolotto S, King C, Bonnes D *et al*: **Continuous Renal Replacement Therapy Dosing in Critically Ill Patients: A Quality Improvement Initiative.** *Am J Kidney Dis* 2019, **74**(6):727-735.

- 1  
2  
3  
4  
5  
6  
7  
8  
9  
10  
11  
12  
13  
14  
15  
16  
17  
18  
19  
20  
21  
22  
23  
24  
25  
26  
27  
28  
29  
30  
31  
32  
33  
34  
35  
36  
37  
38  
39  
40  
41  
42  
43  
44  
45  
46  
47  
48  
49  
50  
51  
52  
53  
54  
55  
56  
57  
58  
59  
60
15. Mottes TA, Goldstein SL, Basu RK: **Process based quality improvement using a continuous renal replacement therapy dashboard.** *BMC Nephrol* 2019, **20**(1):17.
  16. Ruiz EF, Ortiz-Soriano VM, Talbott M, Klein BA, Thompson Bastin ML, Mayer KP, Price EB, Dorfman R, Adams BN, Fryman L *et al*: **Development, implementation and outcomes of a quality assurance system for the provision of continuous renal replacement therapy in the intensive care unit.** *Sci Rep* 2020, **10**(1):20616.
  17. Bowker SL, Stelfox HT, Bagshaw SM: **Critical Care Strategic Clinical Network: Information infrastructure ensures a learning health system.** *Cmaj* 2019, **191**(Suppl):S22-s23.
  18. Brundin-Mather R, Soo A, Zuege DJ, Niven DJ, Fiest K, Doig CJ, Zygun D, Boyd JM, Parsons Leigh J, Bagshaw SM *et al*: **Secondary EMR data for quality improvement and research: A comparison of manual and electronic data collection from an integrated critical care electronic medical record system.** *J Crit Care* 2018, **47**:295-301.
  19. Raymondos K, Dirks T, Quintel M, Molitoris U, Ahrens J, Dieck T, Johanning K, Henzler D, Rossaint R, Putensen C *et al*: **Outcome of acute respiratory distress syndrome in university and non-university hospitals in Germany.** *Crit Care* 2017, **21**(1):122.
  20. Ike JD, Kempker JA, Kramer MR, Martin GS: **The Association Between Acute Respiratory Distress Syndrome Hospital Case Volume and Mortality in a U.S. Cohort, 2002-2011.** *Critical care medicine* 2018, **46**(5):764-773.

**Table 1. Alberta ICUs Delivered CRRT**

| Site                                                   | City       | ICU Type        | Hospital Type | Beds |
|--------------------------------------------------------|------------|-----------------|---------------|------|
| University of Alberta Hospital General Systems ICU     | Edmonton   | Mixed           | Academic      | 32   |
| Mazankowski Alberta Heart Institute Cardiovascular ICU | Edmonton   | Cardiac surgery | Academic      | 24   |
| Mazankowski Alberta Heart Institute Cardiac ICU        | Edmonton   | Cardiac         | Academic      | 8    |
| Royal Alexandra Hospital ICU                           | Edmonton   | Mixed           | Academic      | 25   |
| Grey Nuns Hospital ICU                                 | Edmonton   | Mixed           | Community     | 8    |
| Misericordia Hospital                                  | Edmonton   | Mixed           | Community     | 10   |
| Sturgeon Hospital ICU                                  | Edmonton   | Mixed           | Community     | 5    |
| Stollery Children's Hospital Pediatric ICU             | Edmonton   | Mixed           | Academic      | 16   |
| Stollery Children's Hospital Pediatric Cardiac ICU     | Edmonton   | Cardiac         | Academic      | 16   |
| Foothills Medical Centre ICU                           | Calgary    | Mixed           | Academic      | 28   |
| Foothills Medical Centre Cardiovascular ICU            | Calgary    | Cardiac surgery | Academic      | 16   |
| Foothills Medical Centre Cardiac ICU                   | Calgary    | Cardiac         | Academic      | 18   |
| Peter Lougheed Centre ICU                              | Calgary    | Mixed           | Academic      | 18   |
| Rockyview General Hospital ICU                         | Calgary    | Mixed           | Community     | 10   |
| South Health Campus ICU                                | Calgary    | Mixed           | Community     | 10   |
| Chinook Regional Hospital ICU                          | Lethbridge | Mixed           | Regional      | 7    |
| Red Deer Regional Hospital ICU                         | Red Deer   | Mixed           | Regional      | 12   |
| Alberta Children's Hospital Pediatric ICU              | Calgary    | Mixed           | Academic      | 15   |



**Table 2. Standardized Elements of CRRT Programs**

| <b>Program Element</b> | <b>Operational Definition</b>                                                       | <b>Benchmark</b>                              |
|------------------------|-------------------------------------------------------------------------------------|-----------------------------------------------|
| CRRT Leadership        | Presence of both CRRT physician and clinical nurse educator                         | 100%                                          |
| CRRT Education         | Number of CRRT providers with training/<br>total number of CRRT providers           | 100%                                          |
| <b>Filter Life</b>     | Number of filters lasting 72 hours/<br>Total number of filters used                 | > 50% of filters                              |
| <b>Delivered Dose</b>  | Actual delivered dose in ml/Kg/h /<br>Prescribed dose in ml/Kg/h                    | > 85% of dose<br>and<br>between 25-30 ml/Kg/h |
| <b>Downtime</b>        | Time CRRT not running per day/<br>Each day of CRRT prescription                     | < 15%                                         |
| <b>Ultrafiltration</b> | Actual ultrafiltration achieve in ml/Kg/h/<br>Prescribed ultrafiltration in ml/Kg/h | >85% of prescription                          |
| <b>Access Alarms</b>   | Number of alarms recorded per machine per day of therapy                            | < 5 alarms                                    |
| Adverse Events         | Number of adverse events as per RLS per quarter                                     | 0 events                                      |
| ICU Mortality          | Patient survival to ICU discharge                                                   | > 50%                                         |
| Renal Recovery         | Number of patients still requiring RRT at 90-days                                   | < 10%                                         |

\*CRRT Program Elements are shaded from white to light grey to dark grey as per the Donabedian framework of *structure*, *process* and *outcome*. Specific CRRT KPIs are in bold. Benchmarks have been taken from our internal and external validation of the KPIs. Our primary outcome will measure the performance of specific CRRT process KPIs.

**Table 3. Components of the multi-faceted intervention and knowledge implementation strategy**

| Strategy           | Description                                                                                                                                                                                                                                                                                                                                                                                                                                                                                                                                                   |
|--------------------|---------------------------------------------------------------------------------------------------------------------------------------------------------------------------------------------------------------------------------------------------------------------------------------------------------------------------------------------------------------------------------------------------------------------------------------------------------------------------------------------------------------------------------------------------------------|
| Education          | <ul style="list-style-type: none"> <li>• Site grand rounds and inter-professional seminars</li> <li>• Monthly video/teleconferencing sessions</li> <li>• Site specific educational sessions by inter-professional content experts and local champions</li> <li>• Provide a summary of current guidelines and best practice</li> <li>• Development of website for repository of evidence supporting implementation including banked webinar of project</li> <li>• In-person or virtual visits with ICU leadership, champions and investigator teams</li> </ul> |
| Coaching           | <ul style="list-style-type: none"> <li>• Provide ongoing resources for interpretation of KPI reports</li> <li>• Common troubleshooting advice cards</li> <li>• Provide clinical decision support resources</li> </ul>                                                                                                                                                                                                                                                                                                                                         |
| Audit and Feedback | <ul style="list-style-type: none"> <li>• Baseline and monthly reports of process of care indicators of implementation of the intervention</li> <li>• Comparative performance relative to peer ICUs across province</li> <li>• Quarterly video/teleconferencing sessions to discuss provincial KPI reports</li> </ul>                                                                                                                                                                                                                                          |
| Reminders          | <ul style="list-style-type: none"> <li>• Promotional items (posters; bulletins)</li> <li>• Weekly electronic communication to local site champions to ensure ongoing review of KPI reports and access to additional resources</li> </ul>                                                                                                                                                                                                                                                                                                                      |

Table 4. Project Timeline

| Activity by Quarter                  | 2020    |         |         |         | 2021    |         |         |         | 2022    |         |         |         | 2023    |         |         |
|--------------------------------------|---------|---------|---------|---------|---------|---------|---------|---------|---------|---------|---------|---------|---------|---------|---------|
|                                      | 1       | 2       | 3       | 4       | 1       | 2       | 3       | 4       | 1       | 2       | 3       | 4       | 1       | 2       | 3       |
|                                      | Jan-Mar | Apr-Jun | Jul-Sep | Oct-Dec | Jan-Mar | Apr-Jun | Jul-Sep | Oct-Dec | Jan-Mar | Apr-Jun | Jul-Sep | Oct-Dec | Jan-Mar | Apr-Jun | Jul-Sep |
| <b>Approvals</b>                     |         |         |         |         |         |         |         |         |         |         |         |         |         |         |         |
| Ethics approval/renewal - HREB       | ■       |         |         |         | ■       |         |         |         | ■       |         |         |         | ■       |         |         |
| Ethics approval/renewal - CHREB      |         | ■       |         |         |         | ■       |         |         |         | ■       |         |         |         | ■       |         |
| CTA/Administrative approvals         | ■       |         |         |         |         |         |         |         |         |         |         |         |         |         |         |
| DDA – Edmonton/Calgary/Regional      |         | ■       |         |         |         |         |         |         |         |         |         |         |         |         |         |
| <b>Baseline phase</b>                |         |         |         |         |         |         |         |         |         |         |         |         |         |         |         |
| Recruit Executive/Steering committee |         |         | ■       | ■       |         |         |         |         |         |         |         |         |         |         |         |
| Conduct survey                       |         |         | ■       |         |         |         |         |         |         |         |         |         |         |         |         |
| Extract baseline data - UAH          |         |         | ■       |         |         |         |         |         |         |         |         |         |         |         |         |
| Extract baseline data – all sites    |         |         | ■       | ■       |         |         |         |         |         |         |         |         |         |         |         |
| Develop education strategies         |         |         | ■       | ■       | ■       | ■       | ■       |         |         |         |         |         |         |         |         |
| <b>Intervention phase</b>            |         |         |         |         |         |         |         |         |         |         |         |         |         |         |         |
| Initiate pilot GSICU                 |         |         |         |         |         | ■       |         |         |         |         |         |         |         |         |         |
| Initiate other sites                 |         |         |         |         |         | ■       | ■       | ■       | ■       |         |         |         |         |         |         |
| Implement education strategies       |         |         |         |         |         | ■       | ■       | ■       | ■       | ■       | ■       | ■       | ■       | ■       | ■       |
| CRRT KPI reporting                   |         |         |         |         |         | ■       | ■       | ■       | ■       | ■       | ■       | ■       | ■       | ■       | ■       |
| Protocol Manuscript                  |         |         |         |         |         | ■       | ■       | ■       | ■       |         |         |         |         |         |         |
| Extract intervention phase data      |         |         |         |         |         |         |         |         |         |         |         |         |         | ■       |         |
| Study Manuscript                     |         |         |         |         |         |         |         |         |         |         |         |         |         |         | ■       |

Table 5. Previous CRRT QI Initiatives

| Study                      | Setting                                                                                                                                                  | Sample Size                                                                                | KPI(s) studied                                                                                                                                                                                           | Intervention                                                                                                                                                                                                                                                                 | Outcomes                                                                                                                                                                                                                                                                                                                                                                                     |
|----------------------------|----------------------------------------------------------------------------------------------------------------------------------------------------------|--------------------------------------------------------------------------------------------|----------------------------------------------------------------------------------------------------------------------------------------------------------------------------------------------------------|------------------------------------------------------------------------------------------------------------------------------------------------------------------------------------------------------------------------------------------------------------------------------|----------------------------------------------------------------------------------------------------------------------------------------------------------------------------------------------------------------------------------------------------------------------------------------------------------------------------------------------------------------------------------------------|
| <b>Griffin et al. 2019</b> | <ul style="list-style-type: none"> <li>Single center</li> <li>Adult</li> <li>Medical/Surgical</li> <li>Nephrology prescription</li> </ul>                | <ul style="list-style-type: none"> <li>837 CRRT treatment sessions</li> </ul>              | <ul style="list-style-type: none"> <li>Delivered dose</li> </ul>                                                                                                                                         | <ul style="list-style-type: none"> <li>Stakeholder engagement</li> <li>Modification to EMR</li> <li>Training of ICU nurses</li> <li>Standardization of protocol</li> <li>Improved documentation</li> <li>Modification of order sets</li> <li>Result dissemination</li> </ul> | <ul style="list-style-type: none"> <li>Increased in treatments achieving dose (66.3% vs. 33.3%, p&lt;0.001)</li> <li>Decline in under-dose treatments (11.7% vs. 20.7%, p&lt;0.001)</li> <li>Decline in over-dosed treatments (22% vs. 46%, p&lt;0.001)</li> </ul>                                                                                                                           |
| <b>Mottes et al. 2019</b>  | <ul style="list-style-type: none"> <li>Single center</li> <li>Pediatric</li> <li>Newborn, cardiac, pediatric</li> <li>Nephrology prescription</li> </ul> | <ul style="list-style-type: none"> <li>184 patients</li> <li>2090 patient days</li> </ul>  | <ul style="list-style-type: none"> <li>Filter life</li> <li>Unplanned filter changes</li> <li>Prescribed effluent dose</li> <li>Delivered vs. prescribed effluent dose</li> <li>Fluid balance</li> </ul> | <ul style="list-style-type: none"> <li>Development of CRRT quality dashboard</li> <li>Provided targeted provider based CRRT education</li> </ul>                                                                                                                             | <ul style="list-style-type: none"> <li>Mean filter life increase from 50 to 56 hours</li> <li>Unplanned filter change 33% to 15%</li> <li>Mean delivered dose increased from 2400ml/hr/1.73m<sup>2</sup> to 2845ml/hr/1.73m<sup>2</sup></li> <li>Delivered time increased from 81.1% to 92.7%</li> <li>Increase in achievement of daily desired fluid balance from 69.2% to 83.3%</li> </ul> |
| <b>Ruiz et al. 2020</b>    | <ul style="list-style-type: none"> <li>Single center</li> <li>Adult</li> <li>Medical/Surgical</li> <li>Nephrology prescription</li> </ul>                | <ul style="list-style-type: none"> <li>1185 patients</li> <li>7420 patient-days</li> </ul> | <ul style="list-style-type: none"> <li>CRRT modality</li> <li>Anticoagulation</li> <li>Delivered dose</li> <li>Delivered/Prescribed dose</li> <li>Filter life</li> <li>CRRT access alarms</li> </ul>     | <ul style="list-style-type: none"> <li>Assembly of multidisciplinary team</li> <li>Standardization of CRRT protocol</li> <li>Improvement of CRRT charting</li> <li>Report of CRRT QI metrics</li> <li>Education to clinicians and ICU nurses</li> </ul>                      | <ul style="list-style-type: none"> <li>Increase in CVVHDF use (92.4% to 100%, p&lt;0.001)</li> <li>Increase in RCA use (23.1% to 39.5%, p&lt;0.001)</li> <li>Improved filter life (26 to 31.2h, p=0.02)</li> <li>Decrease in access alarms (2.95 to 1.68/d, p=0.02)</li> </ul>                                                                                                               |

# Reporting checklist for protocol of a clinical trial.

Based on the SPIRIT guidelines.

## Instructions to authors

Complete this checklist by entering the page numbers from your manuscript where readers will find each of the items listed below.

Your article may not currently address all the items on the checklist. Please modify your text to include the missing information. If you are certain that an item does not apply, please write "n/a" and provide a short explanation.

Upload your completed checklist as an extra file when you submit to a journal.

In your methods section, say that you used the SPIRIT reporting guidelines, and cite them as:

Chan A-W, Tetzlaff JM, Gøtzsche PC, Altman DG, Mann H, Berlin J, Dickersin K, Hróbjartsson A, Schulz KF, Parulekar WR, Krleža-Jerić K, Laupacis A, Moher D. SPIRIT 2013 Explanation and Elaboration: Guidance for protocols of clinical trials. *BMJ*. 2013;346:e7586

|                                             |                     | Reporting Item                                                                                               | Page Number |
|---------------------------------------------|---------------------|--------------------------------------------------------------------------------------------------------------|-------------|
| <b>Administrative information</b>           |                     |                                                                                                              |             |
| Title                                       | <a href="#">#1</a>  | Descriptive title identifying the study design, population, interventions, and, if applicable, trial acronym | 1           |
| Trial registration                          | <a href="#">#2a</a> | Trial identifier and registry name. If not yet registered, name of intended registry                         | 1           |
| Trial registration: data set                | <a href="#">#2b</a> | All items from the World Health Organization Trial Registration Data Set                                     | 1           |
| Protocol version                            | <a href="#">#3</a>  | Date and version identifier                                                                                  | 1           |
| Funding                                     | <a href="#">#4</a>  | Sources and types of financial, material, and other support                                                  | 1           |
| Roles and responsibilities: contributorship | <a href="#">#5a</a> | Names, affiliations, and roles of protocol contributors                                                      | 1, 19       |

|    |                           |                     |                                                          |     |
|----|---------------------------|---------------------|----------------------------------------------------------|-----|
| 1  | Roles and                 | <a href="#">#5b</a> | Name and contact information for the trial sponsor       | 1   |
| 2  | responsibilities:         |                     |                                                          |     |
| 3  | sponsor contact           |                     |                                                          |     |
| 4  | information               |                     |                                                          |     |
| 5  |                           |                     |                                                          |     |
| 6  |                           |                     |                                                          |     |
| 7  |                           |                     |                                                          |     |
| 8  | Roles and                 | <a href="#">#5c</a> | Role of study sponsor and funders, if any, in study      | 18  |
| 9  | responsibilities:         |                     | design; collection, management, analysis, and            |     |
| 10 | sponsor and funder        |                     | interpretation of data; writing of the report; and the   |     |
| 11 |                           |                     | decision to submit the report for publication, including |     |
| 12 |                           |                     | whether they will have ultimate authority over any of    |     |
| 13 |                           |                     | these activities                                         |     |
| 14 |                           |                     |                                                          |     |
| 15 |                           |                     |                                                          |     |
| 16 |                           |                     |                                                          |     |
| 17 | Roles and                 | <a href="#">#5d</a> | Composition, roles, and responsibilities of the          | 7   |
| 18 | responsibilities:         |                     | coordinating centre, steering committee, endpoint        |     |
| 19 | committees                |                     | adjudication committee, data management team, and        |     |
| 20 |                           |                     | other individuals or groups overseeing the trial, if     |     |
| 21 |                           |                     | applicable (see Item 21a for data monitoring committee)  |     |
| 22 |                           |                     |                                                          |     |
| 23 |                           |                     |                                                          |     |
| 24 |                           |                     |                                                          |     |
| 25 |                           |                     |                                                          |     |
| 26 | <b>Introduction</b>       |                     |                                                          |     |
| 27 |                           |                     |                                                          |     |
| 28 | Background and            | <a href="#">#6a</a> | Description of research question and justification for   | 4   |
| 29 | rationale                 |                     | undertaking the trial, including summary of relevant     |     |
| 30 |                           |                     | studies (published and unpublished) examining benefits   |     |
| 31 |                           |                     | and harms for each intervention                          |     |
| 32 |                           |                     |                                                          |     |
| 33 |                           |                     |                                                          |     |
| 34 |                           |                     |                                                          |     |
| 35 | Background and            | <a href="#">#6b</a> | Explanation for choice of comparators                    | 4   |
| 36 | rationale: choice of      |                     |                                                          |     |
| 37 | comparators               |                     |                                                          |     |
| 38 |                           |                     |                                                          |     |
| 39 |                           |                     |                                                          |     |
| 40 | Objectives                | <a href="#">#7</a>  | Specific objectives or hypotheses                        | 5,6 |
| 41 |                           |                     |                                                          |     |
| 42 |                           |                     |                                                          |     |
| 43 | Trial design              | <a href="#">#8</a>  | Description of trial design including type of trial (eg, | 6   |
| 44 |                           |                     | parallel group, crossover, factorial, single group),     |     |
| 45 |                           |                     | allocation ratio, and framework (eg, superiority,        |     |
| 46 |                           |                     | equivalence, non-inferiority, exploratory)               |     |
| 47 |                           |                     |                                                          |     |
| 48 |                           |                     |                                                          |     |
| 49 | <b>Methods:</b>           |                     |                                                          |     |
| 50 | <b>Participants,</b>      |                     |                                                          |     |
| 51 | <b>interventions, and</b> |                     |                                                          |     |
| 52 | <b>outcomes</b>           |                     |                                                          |     |
| 53 |                           |                     |                                                          |     |
| 54 |                           |                     |                                                          |     |
| 55 |                           |                     |                                                          |     |
| 56 | Study setting             | <a href="#">#9</a>  | Description of study settings (eg, community clinic,     | 6   |
| 57 |                           |                     | academic hospital) and list of countries where data will |     |
| 58 |                           |                     |                                                          |     |
| 59 |                           |                     |                                                          |     |
| 60 |                           |                     |                                                          |     |

be collected. Reference to where list of study sites can be obtained

|    |                      |                      |                                                                                                                                                                                                                                                                                                                                                                                |
|----|----------------------|----------------------|--------------------------------------------------------------------------------------------------------------------------------------------------------------------------------------------------------------------------------------------------------------------------------------------------------------------------------------------------------------------------------|
| 1  |                      |                      |                                                                                                                                                                                                                                                                                                                                                                                |
| 2  |                      |                      |                                                                                                                                                                                                                                                                                                                                                                                |
| 3  |                      |                      |                                                                                                                                                                                                                                                                                                                                                                                |
| 4  | Eligibility criteria | <a href="#">#10</a>  | Inclusion and exclusion criteria for participants. If applicable, eligibility criteria for study centres and individuals who will perform the interventions (eg, surgeons, psychotherapists)                                                                                                                                                                                   |
| 5  |                      |                      |                                                                                                                                                                                                                                                                                                                                                                                |
| 6  |                      |                      |                                                                                                                                                                                                                                                                                                                                                                                |
| 7  |                      |                      |                                                                                                                                                                                                                                                                                                                                                                                |
| 8  |                      |                      |                                                                                                                                                                                                                                                                                                                                                                                |
| 9  |                      |                      |                                                                                                                                                                                                                                                                                                                                                                                |
| 10 |                      |                      |                                                                                                                                                                                                                                                                                                                                                                                |
| 11 | Interventions:       | <a href="#">#11a</a> | Interventions for each group with sufficient detail to allow replication, including how and when they will be administered                                                                                                                                                                                                                                                     |
| 12 | description          |                      |                                                                                                                                                                                                                                                                                                                                                                                |
| 13 |                      |                      |                                                                                                                                                                                                                                                                                                                                                                                |
| 14 |                      |                      |                                                                                                                                                                                                                                                                                                                                                                                |
| 15 |                      |                      |                                                                                                                                                                                                                                                                                                                                                                                |
| 16 | Interventions:       | <a href="#">#11b</a> | Criteria for discontinuing or modifying allocated interventions for a given trial participant (eg, drug dose change in response to harms, participant request, or improving / worsening disease)                                                                                                                                                                               |
| 17 | modifications        |                      |                                                                                                                                                                                                                                                                                                                                                                                |
| 18 |                      |                      |                                                                                                                                                                                                                                                                                                                                                                                |
| 19 |                      |                      |                                                                                                                                                                                                                                                                                                                                                                                |
| 20 |                      |                      |                                                                                                                                                                                                                                                                                                                                                                                |
| 21 |                      |                      |                                                                                                                                                                                                                                                                                                                                                                                |
| 22 |                      |                      |                                                                                                                                                                                                                                                                                                                                                                                |
| 23 | Interventions:       | <a href="#">#11c</a> | Strategies to improve adherence to intervention protocols, and any procedures for monitoring adherence (eg, drug tablet return; laboratory tests)                                                                                                                                                                                                                              |
| 24 | adherence            |                      |                                                                                                                                                                                                                                                                                                                                                                                |
| 25 |                      |                      |                                                                                                                                                                                                                                                                                                                                                                                |
| 26 |                      |                      |                                                                                                                                                                                                                                                                                                                                                                                |
| 27 |                      |                      |                                                                                                                                                                                                                                                                                                                                                                                |
| 28 | Interventions:       | <a href="#">#11d</a> | Relevant concomitant care and interventions that are permitted or prohibited during the trial                                                                                                                                                                                                                                                                                  |
| 29 | concomitant care     |                      |                                                                                                                                                                                                                                                                                                                                                                                |
| 30 |                      |                      |                                                                                                                                                                                                                                                                                                                                                                                |
| 31 |                      |                      |                                                                                                                                                                                                                                                                                                                                                                                |
| 32 | Outcomes             | <a href="#">#12</a>  | Primary, secondary, and other outcomes, including the specific measurement variable (eg, systolic blood pressure), analysis metric (eg, change from baseline, final value, time to event), method of aggregation (eg, median, proportion), and time point for each outcome. Explanation of the clinical relevance of chosen efficacy and harm outcomes is strongly recommended |
| 33 |                      |                      |                                                                                                                                                                                                                                                                                                                                                                                |
| 34 |                      |                      |                                                                                                                                                                                                                                                                                                                                                                                |
| 35 |                      |                      |                                                                                                                                                                                                                                                                                                                                                                                |
| 36 |                      |                      |                                                                                                                                                                                                                                                                                                                                                                                |
| 37 |                      |                      |                                                                                                                                                                                                                                                                                                                                                                                |
| 38 |                      |                      |                                                                                                                                                                                                                                                                                                                                                                                |
| 39 |                      |                      |                                                                                                                                                                                                                                                                                                                                                                                |
| 40 |                      |                      |                                                                                                                                                                                                                                                                                                                                                                                |
| 41 |                      |                      |                                                                                                                                                                                                                                                                                                                                                                                |
| 42 |                      |                      |                                                                                                                                                                                                                                                                                                                                                                                |
| 43 | Participant timeline | <a href="#">#13</a>  | Time schedule of enrolment, interventions (including any run-ins and washouts), assessments, and visits for participants. A schematic diagram is highly recommended (see Figure)                                                                                                                                                                                               |
| 44 |                      |                      |                                                                                                                                                                                                                                                                                                                                                                                |
| 45 |                      |                      |                                                                                                                                                                                                                                                                                                                                                                                |
| 46 |                      |                      |                                                                                                                                                                                                                                                                                                                                                                                |
| 47 |                      |                      |                                                                                                                                                                                                                                                                                                                                                                                |
| 48 |                      |                      |                                                                                                                                                                                                                                                                                                                                                                                |
| 49 |                      |                      |                                                                                                                                                                                                                                                                                                                                                                                |
| 50 | Sample size          | <a href="#">#14</a>  | Estimated number of participants needed to achieve study objectives and how it was determined, including clinical and statistical assumptions supporting any sample size calculations                                                                                                                                                                                          |
| 51 |                      |                      |                                                                                                                                                                                                                                                                                                                                                                                |
| 52 |                      |                      |                                                                                                                                                                                                                                                                                                                                                                                |
| 53 |                      |                      |                                                                                                                                                                                                                                                                                                                                                                                |
| 54 |                      |                      |                                                                                                                                                                                                                                                                                                                                                                                |
| 55 |                      |                      |                                                                                                                                                                                                                                                                                                                                                                                |
| 56 |                      |                      |                                                                                                                                                                                                                                                                                                                                                                                |
| 57 | Recruitment          | <a href="#">#15</a>  | Strategies for achieving adequate participant enrolment to reach target sample size                                                                                                                                                                                                                                                                                            |
| 58 |                      |                      |                                                                                                                                                                                                                                                                                                                                                                                |
| 59 |                      |                      |                                                                                                                                                                                                                                                                                                                                                                                |
| 60 |                      |                      |                                                                                                                                                                                                                                                                                                                                                                                |

1 **Methods:**

2 **Assignment of**  
3 **interventions (for**  
4 **controlled trials)**  
5  
6

|    |                      |                      |                                                           |
|----|----------------------|----------------------|-----------------------------------------------------------|
| 7  |                      |                      |                                                           |
| 8  | Allocation: sequence | <a href="#">#16a</a> | Method of generating the allocation sequence (eg,         |
| 9  | generation           |                      | computer-generated random numbers), and list of any       |
| 10 |                      |                      | factors for stratification. To reduce predictability of a |
| 11 |                      |                      | random sequence, details of any planned restriction (eg,  |
| 12 |                      |                      | blocking) should be provided in a separate document       |
| 13 |                      |                      | that is unavailable to those who enrol participants or    |
| 14 |                      |                      | assign interventions                                      |
| 15 |                      |                      |                                                           |
| 16 |                      |                      |                                                           |
| 17 |                      |                      |                                                           |
| 18 |                      |                      |                                                           |
| 19 | Allocation           | <a href="#">#16b</a> | Mechanism of implementing the allocation sequence         |
| 20 | concealment          |                      | (eg, central telephone; sequentially numbered, opaque,    |
| 21 | mechanism            |                      | sealed envelopes), describing any steps to conceal the    |
| 22 |                      |                      | sequence until interventions are assigned                 |
| 23 |                      |                      |                                                           |
| 24 |                      |                      |                                                           |
| 25 |                      |                      |                                                           |
| 26 | Allocation:          | <a href="#">#16c</a> | Who will generate the allocation sequence, who will       |
| 27 | implementation       |                      | enrol participants, and who will assign participants to   |
| 28 |                      |                      | interventions                                             |
| 29 |                      |                      |                                                           |
| 30 |                      |                      |                                                           |
| 31 | Blinding (masking)   | <a href="#">#17a</a> | Who will be blinded after assignment to interventions     |
| 32 |                      |                      | (eg, trial participants, care providers, outcome          |
| 33 |                      |                      | assessors, data analysts), and how                        |
| 34 |                      |                      |                                                           |
| 35 |                      |                      |                                                           |
| 36 | Blinding (masking):  | <a href="#">#17b</a> | If blinded, circumstances under which unblinding is       |
| 37 | emergency unblinding |                      | permissible, and procedure for revealing a participant's  |
| 38 |                      |                      | allocated intervention during the trial                   |
| 39 |                      |                      |                                                           |
| 40 |                      |                      |                                                           |

41 **Methods: Data**  
42 **collection,**  
43 **management, and**  
44 **analysis**  
45  
46  
47

|    |                      |                      |                                                             |
|----|----------------------|----------------------|-------------------------------------------------------------|
| 48 | Data collection plan | <a href="#">#18a</a> | Plans for assessment and collection of outcome,             |
| 49 |                      |                      | baseline, and other trial data, including any related       |
| 50 |                      |                      | processes to promote data quality (eg, duplicate            |
| 51 |                      |                      | measurements, training of assessors) and a description      |
| 52 |                      |                      | of study instruments (eg, questionnaires, laboratory        |
| 53 |                      |                      | tests) along with their reliability and validity, if known. |
| 54 |                      |                      |                                                             |
| 55 |                      |                      |                                                             |
| 56 |                      |                      |                                                             |
| 57 |                      |                      |                                                             |
| 58 |                      |                      |                                                             |
| 59 |                      |                      |                                                             |
| 60 |                      |                      |                                                             |



Reference to where data collection forms can be found, if not in the protocol

|    |                            |                      |                                                             |
|----|----------------------------|----------------------|-------------------------------------------------------------|
| 1  |                            |                      |                                                             |
| 2  |                            |                      |                                                             |
| 3  |                            |                      |                                                             |
| 4  | Data collection plan:      | <a href="#">#18b</a> | Plans to promote participant retention and complete         |
| 5  | retention                  |                      | follow-up, including list of any outcome data to be         |
| 6  |                            |                      | collected for participants who discontinue or deviate       |
| 7  |                            |                      | from intervention protocols                                 |
| 8  |                            |                      |                                                             |
| 9  |                            |                      |                                                             |
| 10 | Data management            | <a href="#">#19</a>  | Plans for data entry, coding, security, and storage,        |
| 11 |                            |                      | including any related processes to promote data quality     |
| 12 |                            |                      | (eg, double data entry; range checks for data values).      |
| 13 |                            |                      | Reference to where details of data management               |
| 14 |                            |                      | procedures can be found, if not in the protocol             |
| 15 |                            |                      |                                                             |
| 16 |                            |                      |                                                             |
| 17 |                            |                      |                                                             |
| 18 |                            |                      |                                                             |
| 19 | Statistics: outcomes       | <a href="#">#20a</a> | Statistical methods for analysing primary and secondary     |
| 20 |                            |                      | outcomes. Reference to where other details of the           |
| 21 |                            |                      | statistical analysis plan can be found, if not in the       |
| 22 |                            |                      | protocol                                                    |
| 23 |                            |                      |                                                             |
| 24 |                            |                      |                                                             |
| 25 |                            |                      |                                                             |
| 26 | Statistics: additional     | <a href="#">#20b</a> | Methods for any additional analyses (eg, subgroup and       |
| 27 | analyses                   |                      | adjusted analyses)                                          |
| 28 |                            |                      |                                                             |
| 29 |                            |                      |                                                             |
| 30 | Statistics: analysis       | <a href="#">#20c</a> | Definition of analysis population relating to protocol non- |
| 31 | population and             |                      | adherence (eg, as randomised analysis), and any             |
| 32 | missing data               |                      | statistical methods to handle missing data (eg, multiple    |
| 33 |                            |                      | imputation)                                                 |
| 34 |                            |                      |                                                             |
| 35 |                            |                      |                                                             |
| 36 | <b>Methods: Monitoring</b> |                      |                                                             |
| 37 |                            |                      |                                                             |
| 38 |                            |                      |                                                             |
| 39 | Data monitoring:           | <a href="#">#21a</a> | Composition of data monitoring committee (DMC);             |
| 40 | formal committee           |                      | summary of its role and reporting structure; statement of   |
| 41 |                            |                      | whether it is independent from the sponsor and              |
| 42 |                            |                      | competing interests; and reference to where further         |
| 43 |                            |                      | details about its charter can be found, if not in the       |
| 44 |                            |                      | protocol. Alternatively, an explanation of why a DMC is     |
| 45 |                            |                      | not needed                                                  |
| 46 |                            |                      |                                                             |
| 47 |                            |                      |                                                             |
| 48 |                            |                      |                                                             |
| 49 |                            |                      |                                                             |
| 50 | Data monitoring:           | <a href="#">#21b</a> | Description of any interim analyses and stopping            |
| 51 | interim analysis           |                      | guidelines, including who will have access to these         |
| 52 |                            |                      | interim results and make the final decision to terminate    |
| 53 |                            |                      | the trial                                                   |
| 54 |                            |                      |                                                             |
| 55 |                            |                      |                                                             |
| 56 |                            |                      |                                                             |
| 57 | Harms                      | <a href="#">#22</a>  | Plans for collecting, assessing, reporting, and managing    |
| 58 |                            |                      | solicited and spontaneously reported adverse events         |
| 59 |                            |                      |                                                             |
| 60 |                            |                      |                                                             |

and other unintended effects of trial interventions or trial conduct

|    |                                      |                      |                                                                                                                                                                                                                                    |
|----|--------------------------------------|----------------------|------------------------------------------------------------------------------------------------------------------------------------------------------------------------------------------------------------------------------------|
| 1  |                                      |                      |                                                                                                                                                                                                                                    |
| 2  |                                      |                      |                                                                                                                                                                                                                                    |
| 3  |                                      |                      |                                                                                                                                                                                                                                    |
| 4  | Auditing                             | <a href="#">#23</a>  | Frequency and procedures for auditing trial conduct, if any, and whether the process will be independent from investigators and the sponsor                                                                                        |
| 5  |                                      |                      |                                                                                                                                                                                                                                    |
| 6  |                                      |                      |                                                                                                                                                                                                                                    |
| 7  |                                      |                      |                                                                                                                                                                                                                                    |
| 8  |                                      |                      |                                                                                                                                                                                                                                    |
| 9  | <b>Ethics and</b>                    |                      |                                                                                                                                                                                                                                    |
| 10 | <b>dissemination</b>                 |                      |                                                                                                                                                                                                                                    |
| 11 |                                      |                      |                                                                                                                                                                                                                                    |
| 12 |                                      |                      |                                                                                                                                                                                                                                    |
| 13 | Research ethics approval             | <a href="#">#24</a>  | Plans for seeking research ethics committee / institutional review board (REC / IRB) approval                                                                                                                                      |
| 14 |                                      |                      |                                                                                                                                                                                                                                    |
| 15 |                                      |                      |                                                                                                                                                                                                                                    |
| 16 |                                      |                      |                                                                                                                                                                                                                                    |
| 17 | Protocol amendments                  | <a href="#">#25</a>  | Plans for communicating important protocol modifications (eg, changes to eligibility criteria, outcomes, analyses) to relevant parties (eg, investigators, REC / IRBs, trial participants, trial registries, journals, regulators) |
| 18 |                                      |                      |                                                                                                                                                                                                                                    |
| 19 |                                      |                      |                                                                                                                                                                                                                                    |
| 20 |                                      |                      |                                                                                                                                                                                                                                    |
| 21 |                                      |                      |                                                                                                                                                                                                                                    |
| 22 |                                      |                      |                                                                                                                                                                                                                                    |
| 23 |                                      |                      |                                                                                                                                                                                                                                    |
| 24 |                                      |                      |                                                                                                                                                                                                                                    |
| 25 | Consent or assent                    | <a href="#">#26a</a> | Who will obtain informed consent or assent from potential trial participants or authorised surrogates, and how (see Item 32)                                                                                                       |
| 26 |                                      |                      |                                                                                                                                                                                                                                    |
| 27 |                                      |                      |                                                                                                                                                                                                                                    |
| 28 |                                      |                      |                                                                                                                                                                                                                                    |
| 29 |                                      |                      |                                                                                                                                                                                                                                    |
| 30 | Consent or assent: ancillary studies | <a href="#">#26b</a> | Additional consent provisions for collection and use of participant data and biological specimens in ancillary studies, if applicable                                                                                              |
| 31 |                                      |                      |                                                                                                                                                                                                                                    |
| 32 |                                      |                      |                                                                                                                                                                                                                                    |
| 33 |                                      |                      |                                                                                                                                                                                                                                    |
| 34 |                                      |                      |                                                                                                                                                                                                                                    |
| 35 |                                      |                      |                                                                                                                                                                                                                                    |
| 36 | Confidentiality                      | <a href="#">#27</a>  | How personal information about potential and enrolled participants will be collected, shared, and maintained in order to protect confidentiality before, during, and after the trial                                               |
| 37 |                                      |                      |                                                                                                                                                                                                                                    |
| 38 |                                      |                      |                                                                                                                                                                                                                                    |
| 39 |                                      |                      |                                                                                                                                                                                                                                    |
| 40 |                                      |                      |                                                                                                                                                                                                                                    |
| 41 |                                      |                      |                                                                                                                                                                                                                                    |
| 42 |                                      |                      |                                                                                                                                                                                                                                    |
| 43 | Declaration of interests             | <a href="#">#28</a>  | Financial and other competing interests for principal investigators for the overall trial and each study site                                                                                                                      |
| 44 |                                      |                      |                                                                                                                                                                                                                                    |
| 45 |                                      |                      |                                                                                                                                                                                                                                    |
| 46 |                                      |                      |                                                                                                                                                                                                                                    |
| 47 | Data access                          | <a href="#">#29</a>  | Statement of who will have access to the final trial dataset, and disclosure of contractual agreements that limit such access for investigators                                                                                    |
| 48 |                                      |                      |                                                                                                                                                                                                                                    |
| 49 |                                      |                      |                                                                                                                                                                                                                                    |
| 50 |                                      |                      |                                                                                                                                                                                                                                    |
| 51 |                                      |                      |                                                                                                                                                                                                                                    |
| 52 | Ancillary and post trial care        | <a href="#">#30</a>  | Provisions, if any, for ancillary and post-trial care, and for compensation to those who suffer harm from trial participation                                                                                                      |
| 53 |                                      |                      |                                                                                                                                                                                                                                    |
| 54 |                                      |                      |                                                                                                                                                                                                                                    |
| 55 |                                      |                      |                                                                                                                                                                                                                                    |
| 56 |                                      |                      |                                                                                                                                                                                                                                    |
| 57 | Dissemination policy: trial results  | <a href="#">#31a</a> | Plans for investigators and sponsor to communicate trial results to participants, healthcare professionals, the                                                                                                                    |
| 58 |                                      |                      |                                                                                                                                                                                                                                    |
| 59 |                                      |                      |                                                                                                                                                                                                                                    |
| 60 |                                      |                      |                                                                                                                                                                                                                                    |

public, and other relevant groups (eg, via publication, reporting in results databases, or other data sharing arrangements), including any publication restrictions

|    |                       |                      |                                                           |
|----|-----------------------|----------------------|-----------------------------------------------------------|
| 1  |                       |                      |                                                           |
| 2  |                       |                      |                                                           |
| 3  |                       |                      |                                                           |
| 4  |                       |                      |                                                           |
| 5  | Dissemination policy: | <a href="#">#31b</a> | Authorship eligibility guidelines and any intended use of |
| 6  | authorship            |                      | professional writers                                      |
| 7  |                       |                      |                                                           |
| 8  |                       |                      |                                                           |
| 9  | Dissemination policy: | <a href="#">#31c</a> | Plans, if any, for granting public access to the full     |
| 10 | reproducible research |                      | protocol, participant-level dataset, and statistical code |
| 11 |                       |                      |                                                           |
| 12 |                       |                      |                                                           |

## 13 Appendices

|    |                      |                     |                                                               |
|----|----------------------|---------------------|---------------------------------------------------------------|
| 14 |                      |                     |                                                               |
| 15 | Informed consent     | <a href="#">#32</a> | Model consent form and other related documentation            |
| 16 | materials            |                     | given to participants and authorised surrogates               |
| 17 |                      |                     |                                                               |
| 18 |                      |                     |                                                               |
| 19 | Biological specimens | <a href="#">#33</a> | Plans for collection, laboratory evaluation, and storage      |
| 20 |                      |                     | of biological specimens for genetic or molecular analysis     |
| 21 |                      |                     | in the current trial and for future use in ancillary studies, |
| 22 |                      |                     | if applicable                                                 |
| 23 |                      |                     |                                                               |
| 24 |                      |                     |                                                               |
| 25 |                      |                     |                                                               |

26 The SPIRIT Explanation and Elaboration paper is distributed under the terms of the Creative  
 27 Commons Attribution License CC-BY-NC. This checklist was completed on 16. June 2021 using  
 28 <https://www.goodreports.org/>, a tool made by the [EQUATOR Network](#) in collaboration with  
 29 [Penelope.ai](#)  
 30  
 31  
 32  
 33  
 34  
 35  
 36  
 37  
 38  
 39  
 40  
 41  
 42  
 43  
 44  
 45  
 46  
 47  
 48  
 49  
 50  
 51  
 52  
 53  
 54  
 55  
 56  
 57  
 58  
 59  
 60

## Appendix 2. List of data variables

| Data Variable                                                                                                                                                                                                                                       | Data source       | Description           |
|-----------------------------------------------------------------------------------------------------------------------------------------------------------------------------------------------------------------------------------------------------|-------------------|-----------------------|
| ICU location                                                                                                                                                                                                                                        | TRACER/Enterprise | admission ICU         |
| Age                                                                                                                                                                                                                                                 | TRACER/Enterprise | years                 |
| Sex                                                                                                                                                                                                                                                 | TRACER/Enterprise | M/F                   |
| BMI                                                                                                                                                                                                                                                 | TRACER/Enterprise | n/a                   |
| Date of Hospital Admission                                                                                                                                                                                                                          | TRACER/Enterprise | dd/mm/yyyy            |
| Date of ICU Admission                                                                                                                                                                                                                               | TRACER/Enterprise | dd/mm/yyyy            |
| Admission class                                                                                                                                                                                                                                     | TRACER/Enterprise | med/surg/neuro/trauma |
| ICU discharge location                                                                                                                                                                                                                              | TRACER/Enterprise | unit/hospital         |
| ICU Admission Diagnosis<br>CV<br>Respiratory<br>Gastrointestinal<br>Genitourinary/Renal<br>Endocrinological/Metabolic<br>Neurological<br>Trauma<br>Burn<br>Sepsis<br>Surgery                                                                        | TRACER/Enterprise | yes/no                |
| Co-morbidities<br>AIDS<br>Chronic Dialysis<br>Chronic Heart Failure<br>Respiratory Insufficiency<br>Cirrhosis<br>Diabetes Mellitus<br>Hepatic Failure<br>Immune Suppression<br>Leukemia<br>Lymphoma<br>Metastatic Cancer<br>Coronary Artery Disease | TRACER/Enterprise | yes/no                |
| Clinical Frailty Scale                                                                                                                                                                                                                              | TRACER/Enterprise | number                |
| APACHE II Score                                                                                                                                                                                                                                     | TRACER/Enterprise | number                |
| SOFA score                                                                                                                                                                                                                                          | TRACER/Enterprise | number                |
| Invasive/non-invasive ventilation                                                                                                                                                                                                                   | TRACER/Enterprise | hrs/min               |
| Vasopressors (include type)                                                                                                                                                                                                                         | TRACER/Enterprise | hrs/min               |
| CRRT Duration                                                                                                                                                                                                                                       | TRACER/Enterprise | hrs/min               |
| Cumulative daily fluid balance prior to RRT                                                                                                                                                                                                         | TRACER/Enterprise | mls                   |
| Creatinine, urea, pH, bicarbonate, potassium on day of RRT initiation                                                                                                                                                                               | TRACER/Enterprise | result                |

|                                                                          |                   |                       |
|--------------------------------------------------------------------------|-------------------|-----------------------|
| Renal Recovery at ICU Discharge                                          | TRACER/Enterprise | y/n - IHD             |
| Renal Recovery at Hospital Discharge                                     | NIS/PARIS/DIMR    | y/n - IHD/PD          |
| Renal Recovery at 90 days                                                | NIS/PARIS/DIMR    | y/n - IHD/PD          |
| ICU Mortality                                                            | TRACER/Enterprise | A/D                   |
| Hospital Mortality                                                       | TRACER/Enterprise | A/D                   |
| 90-day Mortality                                                         | DIMR              | A/D                   |
| ICU length of Stay                                                       | TRACER/Enterprise | days                  |
| Hospital Length of Stay                                                  | TRACER/Enterprise | days                  |
| Number of admissions to site                                             | TRACER/Enterprise | aggregate             |
| Patient days                                                             | TRACER/Enterprise | aggregate             |
| Ventilator days                                                          | TRACER/Enterprise | aggregate             |
| Dialysis days                                                            | TRACER/Enterprise | Days<br>CRRT/IHD/SLED |
| CRRT data                                                                | Baxter            | aggregate             |
| Filter life                                                              |                   | aggregate             |
| Reasons for retiring filters                                             |                   | aggregate             |
| Treatment time lost                                                      |                   | aggregate             |
| Prescription/dose                                                        |                   | aggregate             |
| Machine alarms                                                           |                   | aggregate             |
| Machine down times                                                       |                   | aggregate             |
| Type of coagulation                                                      |                   | aggregate             |
| Blood flow rates                                                         |                   | aggregate             |
| Filtration fraction                                                      |                   | aggregate             |
| Adverse events                                                           |                   | aggregate             |
| Economic data                                                            | DIMR              | aggregate             |
| Cost of filters, fluids, anticoagulation medications, dialysis catheters |                   | aggregate             |
| Patient life-years gained                                                |                   | aggregate             |
| Quality of life adjusted years (QUALY)                                   |                   | aggregate             |
| Re-hospitalizations                                                      |                   | aggregate             |
| Recurrence/chronic RRT                                                   |                   | aggregate             |
| Health care provider related costs                                       |                   | aggregate             |

308 Campus Tower  
 University of Alberta, Edmonton, AB T6G 1K8  
 p. 780.492.9724 (Biomedical Panel)  
 p. 780.492.0302 (Health Panel)  
 p. 780.492.0459

Approval Form

1  
2  
3  
4  
5  
6  
7  
8  
9  
10  
11  
12  
13  
14  
15  
16  
17  
18  
19  
20  
21  
22  
23  
24  
25  
26  
27  
28  
29  
30  
31  
32  
33  
34  
35  
36  
37  
38  
39  
40  
41  
42  
43  
44  
45  
46  
47  
48  
49  
50  
51  
52  
53  
54  
55  
56  
57  
58  
59  
60

Date: January 22, 2020  
 Study ID: Pro00075274  
 Principal Investigator: Oleksa Rewa  
 Study Title: Improving the quality of the performance and delivery of CRRT to critically ill patients in Alberta  
 Approval Expiry Date: Thursday, January 21, 2021  
 Sponsor/Funding Agency: Baxter Healthcare Inc  
 Sponsor/Funding Agency: University Hospital Foundation UHF

| Project ID                      | Project Title                                          | Speed Code | Other Information |
|---------------------------------|--------------------------------------------------------|------------|-------------------|
| <a href="#">View</a> RES0044818 | Development of a CRRT Quality Dashboard (QUALITY CRRT) |            | Baxter Healthcare |
| <a href="#">View</a> RES0040497 | QUALITY ICU                                            | ZAAIH      | UHF - Kaye Fund   |

Thank you for submitting the above study to the Health Research Ethics Board - Health Panel. Your application, including the following, has been reviewed and approved on behalf of the committee;

- Quality CRRT Survey (1/22/2020)
- Items to Be Included in Medical Record Review (1/22/2020)
- Quality CRRT Protocol (11/26/2020)

The Health Research Ethics Board assessed all matters required by section 50(1)(a) of the Health Information Act. It has been determined that a portion of the research described in the ethics application is retrospective review for which consent for access to personally identifiable health information would not be reasonable, feasible or practical. Consent therefore is not required for access to personally identifiable health information described in the ethics application. In order to comply with the Health Information Act, a copy of the approval form is being sent to the Office of the Information and Privacy Commissioner.

Any proposed changes to the study must be submitted to the REB for approval prior to implementation. A renewal report must be submitted next year prior to the expiry of this approval if your study still requires ethics approval. If you do not renew on or before the renewal expiry date ( Thursday, January 21, 2021), you will have to re-submit an ethics application.

Approval by the Health Research Ethics Board does not encompass authorization to access the patients, staff or resources of Alberta Health Services or other local health care institutions for the purposes of the research. Enquiries regarding Alberta Health approvals should be directed to (780) 407-6041. Enquiries regarding Covenant Health approvals should be directed to (780) 735-2274.

Sincerely,  
 Anthony S. Joyce, PhD.  
 Chair, Health Research Ethics Board - Health Panel

Note: This correspondence includes an electronic signature (validation and approval via an online system).

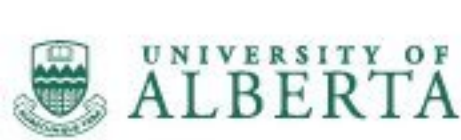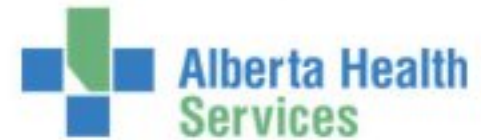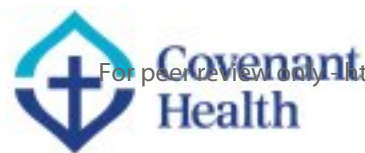

# BMJ Open

## Improving the quality of the performance and delivery of continuous renal replacement therapy (CRRT) to critically ill patients across a healthcare system – QUALITY CRRT: A Study Protocol

|                                 |                                                                                                                                                                                                                                                                                                                                                                                                                                                                                                                                                                                                                                                                                                                                                                                                                                                                                                                    |
|---------------------------------|--------------------------------------------------------------------------------------------------------------------------------------------------------------------------------------------------------------------------------------------------------------------------------------------------------------------------------------------------------------------------------------------------------------------------------------------------------------------------------------------------------------------------------------------------------------------------------------------------------------------------------------------------------------------------------------------------------------------------------------------------------------------------------------------------------------------------------------------------------------------------------------------------------------------|
| Journal:                        | <i>BMJ Open</i>                                                                                                                                                                                                                                                                                                                                                                                                                                                                                                                                                                                                                                                                                                                                                                                                                                                                                                    |
| Manuscript ID                   | bmjopen-2021-054583.R1                                                                                                                                                                                                                                                                                                                                                                                                                                                                                                                                                                                                                                                                                                                                                                                                                                                                                             |
| Article Type:                   | Protocol                                                                                                                                                                                                                                                                                                                                                                                                                                                                                                                                                                                                                                                                                                                                                                                                                                                                                                           |
| Date Submitted by the Author:   | 29-Nov-2021                                                                                                                                                                                                                                                                                                                                                                                                                                                                                                                                                                                                                                                                                                                                                                                                                                                                                                        |
| Complete List of Authors:       | Opgenorth, Dawn; University of Alberta Faculty of Medicine & Dentistry, Department of Critical Care Medicine<br>Reil, Ellen; Alberta Health Services<br>Lau, Vincent; University of Alberta Faculty of Medicine & Dentistry, Department of Critical Care Medicine<br>Fraser, Nancy; Alberta Health Services, Critical Care Strategica Clinical Network<br>Zuege, Danny; Alberta Health Services, Critical Care Strategic Clinical Network; University of Calgary, Department of Critical Care Medicine<br>Wang, Xiaoming; Alberta Health Services<br>Bagshaw, Sean; University of Alberta Faculty of Medicine & Dentistry, Department of Critical Care Medicine; Alberta Health Services, Critical Care Strategic Clinical Network<br>Rewa, Oleksa; University of Alberta Faculty of Medicine & Dentistry, Department of Critical Care Medicine; Alberta Health Services, Critical Care Strategic Clinical Network |
| <b>Primary Subject Heading</b>: | Health services research                                                                                                                                                                                                                                                                                                                                                                                                                                                                                                                                                                                                                                                                                                                                                                                                                                                                                           |
| Secondary Subject Heading:      | Intensive care, Renal medicine                                                                                                                                                                                                                                                                                                                                                                                                                                                                                                                                                                                                                                                                                                                                                                                                                                                                                     |
| Keywords:                       | INTENSIVE & CRITICAL CARE, Dialysis < NEPHROLOGY, HEALTH SERVICES ADMINISTRATION & MANAGEMENT, Quality in health care < HEALTH SERVICES ADMINISTRATION & MANAGEMENT                                                                                                                                                                                                                                                                                                                                                                                                                                                                                                                                                                                                                                                                                                                                                |
|                                 |                                                                                                                                                                                                                                                                                                                                                                                                                                                                                                                                                                                                                                                                                                                                                                                                                                                                                                                    |

SCHOLARONE™  
Manuscripts

1  
2  
3  
4  
5  
6  
7  
8  
9  
10  
11  
12  
13  
14  
15

# Improving the quality of the performance and delivery of continuous renal replacement therapy (CRRT) to critically ill patients across a healthcare system – QUALITY CRRT: A Study Protocol

16 Dawn Opgenorth<sup>1</sup>, Ellen Reil<sup>2</sup>, Vincent Lau<sup>1</sup>, Nancy Fraser<sup>3</sup>, Danny J Zuege<sup>3,4</sup>, Xiaoming Wang<sup>2</sup>, Sean M. Bagshaw<sup>1,3</sup>, Oleksa G. Rewa<sup>1,3</sup>

19 <sup>1</sup> Department of Critical Care Medicine, Faculty of Medicine and Dentistry, University of Alberta and Alberta Health Services

20 <sup>2</sup> Alberta Health Services

21 <sup>3</sup> Critical Care Strategic Clinical Network, Alberta Health Services

22 <sup>4</sup> Department of Critical Care Medicine, Cumming School of Medicine, University of Calgary and Alberta Health Services

23  
24  
25  
26  
27

## Corresponding Author

28 Oleksa G. Rewa

29 Assistant Professor

30 Department of Critical Care Medicine

31 University of Alberta

32 CSB 2-124 8440 112<sup>th</sup> St NW

33 Edmonton, Alberta

34 T6G 2B7

35 t. 780 263 3280

36 f. 780 492 1500

37 e. [rewa@ualberta.ca](mailto:rewa@ualberta.ca)

38  
39  
40  
41  
42  
43  
44

**Word Count 3569**

**Figures 0**

**Tables 5**

**Appendices 3**

45  
46  
47  
48

**Keywords:** Critical Care Medicine; Intensive Care; Continuous Renal Replacement Therapy; Dialysis; Quality; Key Performance Indicators

49  
50

**Trial Registration:** [clinicaltrials.gov](http://clinicaltrials.gov), NCT04221932, first posted 9 January 2020

51  
52  
53  
54  
55  
56  
57  
58  
59  
60

**Protocol Version:** 1.0, June 15 2020



## Abstract (232 words)

**Introduction:** Continuous Renal Replacement Therapy (CRRT) is a continuous form of dialysis used to support critically ill patients with acute kidney injury. The ideal delivery of CRRT requires ongoing monitoring and reporting to adjust practice and deliver optimal therapy. However, this practice occurs variably.

**Methods:** QUALITY CRRT is a multi-center, prospective, stepped-wedged, interrupted time-series evaluation of the effectiveness, safety and cost of implementing a multi-faceted CRRT quality assurance and improvement program across an entire healthcare system. This study will focus on the standardization of CRRT programs with similar structure, process and outcome metrics by the reporting of CRRT Key Performance Indicators (KPIs). The primary outcome will be the quarterly performance of CRRT KPIs. Secondary outcomes will include patient-centered outcomes and economic outcomes. Analysis will compare pre- and post-implementation groups as well as for the performance of KPIs using an interrupted time-series methodology. The health economic evaluation will include a within-study analysis and a longer-term model-based analysis.

**Discussion:** The effective delivery of CRRT to critically ill patients ideally requires a standardized approach of best practice assessment and ongoing audit and feedback of standardized performance measures. QUALITY CRRT will test the application of this strategy stakeholder engagement and stepped-wedged implementation across an entire healthcare system.

**Ethics and Dissemination:** This study has received ethics approval. We will plan to publish the results in a peer-reviewed journal.

**Trial Registration:** [clinicaltrials.gov](https://clinicaltrials.gov), NCT04221932, first posted 9 January 2020.

## Strengths and Limitations

- **Quality CRRT involves the implementation of CRRT KPIs across an entire healthcare system**
- **Study includes pilot program followed by broader stepped-wedged roll out of CRRT KPIs across all ICUs performing CRRT**
- **Included CRRT KPIs informed from current evidence-base as well as stakeholder surveys**
- **Study limited to CRRT and does not include IRR**

## Introduction

Continuous renal replacement therapy (CRRT) is a continuous method of blood purification that provides slow uninterrupted clearance of uremic toxins and enables acid-base, electrolyte and volume homeostasis while preserving hemodynamic stability.[1, 2]

### **CRRT is the most common initial form of dialysis in ICU settings**

The recent epidemiological study, AKI-EPI, revealed that CRRT was the most common form of initial acute RRT for patients with severe AKI.[3] These patients have greater illness severity, are more likely to die and have significantly increased healthcare utilization when compared to their non-CRRT critically ill counterparts.[2] As our population ages, becomes more medically complex, and presents with greater severity of illness, the utilization of CRRT is likely to increase and become an increasingly vital component of life-sustaining therapy.[3]

### **CRRT is expensive but there are substantial opportunities to improve costs**

CRRT is a costly and labour intensive resource.[4] In the setting of increasingly constrained healthcare resources, intervention is needed which may identify and eliminate inefficiencies, improve performance, and decrease waste while improving provider satisfaction and achieving better patient outcomes.[5, 6] Currently, performance indicators for CRRT are not routinely measured, and as such, we are not in a position to understand or identify the inefficiencies or gaps in the quality of care of CRRT delivered to our sickest patients.[6]

### **Current CRRT practices are not standardized**

In our healthcare system, CRRT is delivered as per individual unit protocols and practice patterns and is not consistently monitored (i.e., initiation strategies, anticoagulation techniques, dose delivered, ultrafiltration, etc). Discrepancies from best practices and lack of standardization

1  
2  
3 of CRRT delivery can result in unplanned CRRT interruptions, decreased treatment time,  
4 inadequate dose delivery, and impaired clearance of toxic metabolites which can lead to  
5 worsened patient outcomes.[7, 8]  
6  
7

8  
9  
10 Such suboptimal practice variation may relate to the lack of well-developed key performance  
11 indicators (KPIs) for CRRT delivery and performance, and the associated audit and feedback  
12 function such KPIs can facilitate. KPIs are measures that can be used to monitor the performance  
13 of healthcare delivery.[9] They are necessary and can improve reliability of care, standardize  
14 complex interventions, and provide a platform to measure and monitor performance and the  
15 impact of practice changes.[10, 11]  
16  
17  
18  
19  
20  
21  
22  
23

24  
25 Recently, previous phases of work have identified and prioritized KPIs for CRRT care.[12, 13]  
26  
27 Implementing these CRRT KPIs may change practice to provide effective, validated and  
28 standardized CRRT.[12, 13] Though several previous programs of work have looked to  
29 implement these CRRT KPIs into clinical practice, but no program has rigorously tested the  
30 implementation of this structure and monitoring across an entire healthcare system.[14-16]  
31  
32  
33  
34  
35  
36  
37  
38  
39  
40

## 41 **Objectives and Research Questions:**

### 42 **Primary Objective**

43  
44 The primary objective is to improve the quality of care delivered to critically ill patients  
45 receiving CRRT in Alberta, as measured by CRRT KPI development, monitoring and  
46 performance.  
47  
48  
49  
50  
51

### 52 **Secondary Objectives**

1  
2  
3 These will include patient centered outcomes (i.e., ICU mortality and length of stay, duration of  
4 CRRT therapy, 90-day renal recovery) and cost of health services, including unit specific CRRT  
5  
6 costs.  
7  
8  
9

### 10 **Research Hypotheses:**

- 14 1. Can we improve the performance of CRRT programs through the implementation of  
15 evidence-based clinical practice guidelines and provision of targeted multi-faceted CRRT  
16 audit, feedback and education sessions?  
17  
18
- 21 2. Will the implementation of standardized CRRT programs our healthcare system's ICUs  
22 result in decreased healthcare systems costs?  
23  
24
- 27 3. What is the impact of a multi-faceted quality assurance and improvement program on the  
28 efficacy and safety of care in critically ill patients requiring CRRT across our healthcare  
29 system?  
30  
31  
32  
33  
34  
35  
36

### 37 **Methods**

#### 38 **Trial Design**

39  
40  
41 The QUALITY CRRT trial is a pragmatic, multi-center, population-level, stepped-wedged,  
42 interrupted time series evaluation of the implementation of an evidence-based CRRT quality  
43 assurance and improvement program to standardize the delivery of CRRT in the 15 adult  
44 general and cardiac ICUs and 3 pediatric ICUs in our healthcare system that provide CRRT  
45  
46  
47  
48  
49  
50  
51 (Table 1). It conforms with the SPIRIT Checklist for study protocols (see Appendix 1).  
52  
53

#### 54 **Trial Oversight**

1  
2  
3 QUALITY CRRT will be led by a small but specialized Steering Committee whose members  
4 bring extensive experience with CRRT programs and clinical leadership, implementation science  
5 and healthcare systems research. This pan-provincial team will be based at the University of  
6 Alberta Hospital and will include representation from the Critical Care Strategic Network of  
7 Alberta Health Services (the provincial body which provides provincial liaison, networking and  
8 coordination of adult and pediatric critical care in Alberta).[17] The Steering Committee will be  
9 responsible for program management, development and implementation of minimum standards  
10 for CRRT programs, KPI reporting, targeted education and overall trial management.  
11  
12  
13  
14  
15  
16  
17  
18  
19  
20  
21  
22  
23

## 24 **Patient and Public Involvement**

25  
26 While this study currently does not directly include patients in its design, the Critical Care  
27 Strategic Clinical Network includes patient representatives on its core committee and is  
28 represented on the study team. The study objectives and research hypotheses have been  
29 developed along with these members. Finally, the results of this study will be disseminated to  
30 patients and families leveraging the strengths of the Critical Care Strategic Clinical Network.  
31 This will be conducted through online resources, publications, and public engagement events  
32 (i.e., Café Scientifiques).  
33  
34  
35  
36  
37  
38  
39  
40  
41  
42  
43  
44

## 45 **Population and Eligibility**

46  
47 This study will be conducted at all ICUs in Alberta capable of providing CRRT. All subjects in  
48 this study will be critically ill patients (i.e., pediatric and adult) receiving CRRT as part of their  
49 care. There will be no exclusion criteria. The inclusion criteria are purposely broad in scope to  
50 capture a systems level sample of critically ill patients. This will be done so that these new KPI  
51  
52  
53  
54  
55  
56  
57  
58  
59  
60

1  
2  
3 monitoring processes may be developed and implemented as policy, and outcomes measured on  
4  
5 a population level.  
6  
7

8 All new ICU admissions receiving CRRT in the 15 adult and 3 pediatric ICUs in Alberta who  
9  
10 provide this therapy will be included in this project. In 2019, there were 12,132 adult and 1,592  
11  
12 pediatric admissions per year with 5.6% and 1.4% of these patients (i.e., 680 adult and 22  
13  
14 pediatric patients) receiving CRRT. As this study will be conducted over a 4-year period, thus  
15  
16 data on approximately 3,000 adult and pediatric (i.e., 2900 adult and 100 pediatric) patients will  
17  
18 be included in this project.  
19  
20  
21  
22

### 23 **Interventions, duration and frequency of follow-up**

24  
25 The project consists of a 24-month baseline phase to measure current CRRT practice and a 24-  
26  
27 month intervention phase to implement a standardized CRRT program targeting ICUs-based  
28  
29 CRRT KPIs and monitor performance and compliance of participating sites. Data from the 24-  
30  
31 month intervention phase will be used to model long-term health economic outcomes.  
32  
33  
34

### 35 **Baseline Phase**

36  
37  
38 Baseline data collection: baseline clinical and resource utilization data will be collected on all  
39  
40 patients having received receiving CRRT between November 1, 2017 and October 31, 2019.

41  
42  
43 Stakeholder survey: A healthcare system-wide survey of care providers and stakeholders at  
44  
45 participating ICUs will be conducted to identify and establish agreement on the most appropriate  
46  
47 KPIs to measure at their ICU during the intervention phase. The survey will be administered  
48  
49 through Survey Monkey ([www.surveymonkey.com](http://www.surveymonkey.com)).  
50  
51

### 52 **Intervention Phase**

53  
54  
55 KPI benchmark reporting: The primary study intervention will be the implementation of audit  
56  
57  
58  
59  
60

1  
2  
3 and feedback on CRRT KPI benchmarks identified by the individual ICU teams in the baseline  
4 survey. We will implement a minimal bundle of potential CRRT KPIs with evidence to measure  
5  
6 will include CRRT program structure, filter life, downtime, delivered dose, ultrafiltration  
7  
8 achieved, alarms, adverse events, ICU mortality and renal recovery (Table 2).[6, 12, 13]  
9  
10 Reports will be implemented and reviewed with ICU stakeholders ad hoc and at quarterly  
11  
12 intervals.  
13  
14  
15

16  
17 Prior to implementation of the reports, each ICU will receive multi-faceted education strategies  
18  
19 tailored to their site and informed by local CRRT leaders, champions and stakeholders (Table  
20  
21 3). Education strategies will include, 1) inter-professional grand rounds, seminars and webinars  
22  
23 supported by a web-based information repository, 2) identification of site champions to provide  
24  
25 onsite advocacy and education. The intervention will be multidisciplinary, targeting CRRT  
26  
27 prescribers, nurses, unit operational leaders and educators. After the intervention is  
28  
29 implemented quarterly audit and feedback reports and quarterly tele/videoconference and/or in-  
30  
31 person visits will be conducted to support the ICUs. The content of this feedback and methods  
32  
33 will be individualized to individual ICU needs and preferences.  
34  
35  
36  
37

38  
39 While the initial education strategy will contain similar themes across all sites, each site will be  
40  
41 encouraged to facilitate and participate with our working group in their own audit and  
42  
43 educational activities to address unit specific shortcomings in their CRRT KPI performance. A  
44  
45 central website repository of troubleshooting tools that will be hosted by the Critical Care  
46  
47 Strategic Network of Alberta Health Services will be available for sites who are not achieving  
48  
49 KPI benchmarks.  
50  
51

52  
53 The CRRT KPI reporting program will be implemented in a stepped fashion with a pilot  
54  
55 occurring at the GSICU at the UAH over a 3-month period to ensure feasibility, proper  
56  
57  
58  
59



1  
2  
3 reporting and compliance. This will lead to optimization of the tools prior to more generalized  
4  
5 use. The pilot will be followed by a stepped-wedge roll out at centers across Alberta over the  
6  
7 subsequent 12 months.  
8  
9

10 Intervention data collection: At the end of the intervention phase, clinical and resource  
11  
12 utilization data will be collected on all patients receiving CRRT during the 24-month  
13  
14 intervention period (Table 4).  
15  
16

## 17 **Outcomes**

### 18 **Primary Outcome**

19  
20 The primary endpoint measures are quarterly changes in the performance of the CRRT process  
21  
22

23  
24 KPIs:

- 25 • Average filter lifespan, measured in hours
- 26 • Downtime, as percentage of prescribed time
- 27 • Delivered dose, as a percentage of prescribed dose
- 28 • Ultrafiltration achieved, as a percentage of prescribed ultrafiltration
- 29 • Alarms as recorded per machine, per day

### 30 **Secondary Outcomes**

31  
32 Patient centered

- 33 • Mortality - ICU, hospital, 90-day post discharge
- 34 • Length of stay - ICU and hospital
- 35 • Duration of CRRT treatment in hours
- 36 • Renal recovery 90-days post ICU discharge

37  
38 Health economic

- Supply costs - dialysis filters, fluids, dialysis catheters
- Medication costs – anticoagulation, renal specific replacement medications (e.g. erythropoietin analogues, calcium binders, etc.)
- Health care worker costs – physician billing, nursing (hrs)
- ICU and hospital stay costs (length of stay)
- Progression to end stage renal disease - projected chronic dialysis costs
- Quality of life adjusted years (QALYs)
- Health-related Quality of Life (HRQoL)
- Total health care costs

### **Data Management**

Data elements will include patient centered variables: (i.e., demographics, type of admission [medical, surgical, trauma]), clinical characteristics (i.e., comorbid diseases, primary diagnosis), illness severity (i.e., APACHE II, Sequential Organ Failure Assessment [SOFA], Clinical Frailty Score [CFS]), treatment intensity (i.e., duration of renal replacement therapy, mechanical ventilation, vasoactive therapy), ICU and hospital lengths of stay, and outcomes (i.e., renal recovery, mortality, HRQoL); and CRRT associated cost data: (i.e., filter use, prescription/dose, machine alarms/down time, coagulation, adverse events, re-hospitalizations, progression of renal disease). A schedule of data variables to be captured is summarized in Appendix 2.

Data sources will include TRACER and Enterprise data repository, AHS Data Integration, Management and Reporting (DIMR) administrative databases, the Nephrology Information System (NIS), the Patient based Renal Information System (PARIS) and Baxter Healthcare Inc.[18]

1  
2  
3 All study documents will be kept in a locked filing cabinet in a locked office, and computer files  
4  
5 will be encrypted and stored on a secure network for 5 years following completion of the study.  
6  
7

### 8 9 **Co-Enrollment**

10  
11 QUALITY CRRT is a pragmatic, real world, quality improvement and assurance program. Due  
12  
13 to the healthcare systems scope of the program, there are no patient-level interventions.  
14

15 Accordingly, there will be no limitations to co-enrollment or specific patient or clinician  
16  
17 practices.  
18  
19

### 20 21 22 **Statistical Analyses**

23  
24 Analysis will be conducted between the pre- and post-implementation groups. Analyses of the  
25  
26 primary and secondary outcomes will involve summary measures obtained by aggregating the  
27  
28 endpoints. Analyses will be performed using SAS Enterprise Guide 7.1 (Cary, North  
29  
30 Carolina, USA). Baseline comparisons will be performed using chi-squared test for equal  
31  
32 proportions with results to be reported as frequencies with percentages. Continuous normally  
33  
34 distributed variables will be compared using t-tests and reported as means with standard  
35  
36 deviation, while non-parametrically distributed will be compared using Wilcoxon rank sum  
37  
38 tests and reported as medians and interquartile ranges (IQRs). In case of small sample size,  
39  
40 Fisher's exact test will be used.  
41  
42  
43  
44  
45

46  
47 Interrupted time series (ITS) analyses using autoregressive integrated moving average  
48  
49 (ARIMA) models will be employed for important risk factors to account for temporal trends  
50  
51 and to determine whether there were changes in the clinic outcomes at the intervention period  
52  
53 (compared with the baseline period) and associated with implementation of the evidence-based  
54  
55  
56  
57  
58  
59  
60

1  
2  
3 acute RRT pathway.  
4

5  
6 Cost-effectiveness or net-benefit (investment-return) analysis using a decision tree will be  
7  
8 adopted to compare return (or benefit, B) and investment (or cost, C) of the evidence-based  
9  
10 RRT pathway. Reduction of healthcare systems costs including inpatient services (length of  
11  
12 stay of primary admission, number of readmissions, and readmission LOS), outpatient services  
13  
14 (emergency room visits, and clinic visits), physician services (specialist visits, and general  
15  
16 practitioner visits), and ongoing new end-stage renal disease will be estimated based on  
17  
18 generalized linear models. Cost-effectiveness will be analyzed by estimating incremental cost  
19  
20 and effectiveness based on quality-adjusted life years (QALYs) gained. QALYs will be  
21  
22 calculated based on health-related quality of life as measured by the EQ-5D-5L in adults and  
23  
24 the PedsQL in children. Patients will be sent letters with study team contact information in  
25  
26 order for them to contact our team in order to complete these questionnaires.  
27  
28  
29  
30

### 31 **Performance of CRRT KPIs**

32  
33  
34 Our primary outcome will be the iterative performance of selected CRRT KPIs. Based on prior  
35  
36 work, KPIs might include filter life (measured in hours), delivered dose (measured in  
37  
38 mL/kg/hr), downtime (measured in percentage of time), ultrafiltration realized (measured in  
39  
40 percentage of prescribed) and access alarms (measured in total number per day). We will aim  
41  
42 to both compare the performance of these KPIs to historical controls, as well as prospectively  
43  
44 through an interrupted time-series analysis. The interrupted time-series analysis will allow us  
45  
46 to follow variable changes over time, allow for assessment of gradual change, and is consistent  
47  
48 with traditional quality improvement initiatives.  
49  
50  
51

### 52 **Patient-Centered Outcomes Analysis**

53  
54 The patient-centered outcome analysis will include ICU, hospital and 90-day mortalities, ICU  
55  
56  
57  
58  
59  
60

1  
2  
3 and hospital lengths of stay, duration of CRRT treatment, and renal recovery measured at 90-  
4 days months. While this study is not designed to evaluate the effect that the implementation of  
5 the reporting of CRRT KPIs will have on mortality, lengths of treatment and stay or renal  
6 recovery, these are important patient-centered outcomes that will need to be considered as  
7 balancing measures for CRRT KPI reporting and implementation of our multi-faceted  
8 knowledge translation intervention.  
9  
10  
11  
12  
13  
14  
15

### 16 **Health Economic Evaluation**

17  
18 The economic evaluation will comprise two parts: 1) a within-study analysis, and 2) a longer-  
19 term, model-based analysis.  
20  
21  
22  
23

24  
25 The within-study analysis will focus on costs and outcomes collected during the study period. It  
26 will include total quarterly unit-specific CRRT-associated costs following the implementation  
27 of the CRRT KPI reporting program. This endpoint will be determined from our provincial CIS  
28 and Alberta Blue Cross databases. Specifically, we will evaluate and compare the 1) costs of  
29 supplying CRRT filters, 2) costs of CRRT fluids, 3) cost of CRRT anticoagulation and, 4) costs  
30 and utilization of dialysis catheters. Costs will be calculated in part using CRRT process  
31 measures captured by our CRRT KPIs (i.e., filter life and number of filters used,  
32 anticoagulation modality, dose delivered, and effluent used, etc.). CRRT-associated costs were  
33 selected as an important secondary outcome as these will be most immediately affected with the  
34 implementation of the CRRT KPI quality assurance program across unit.  
35  
36  
37  
38  
39  
40  
41  
42  
43  
44  
45  
46

47  
48 We will also determine healthcare systems costs to include total ICU and hospital stay  
49 associated costs, ongoing new end-stage renal disease (i.e., chronic RRT) costs, total healthcare  
50 costs, and outcomes [ mortality, quality-adjusted life years (QALY)]. Modelling analysis will  
51 provide cost estimates from both a healthcare system and societal perspective (capturing costs  
52  
53  
54  
55  
56  
57  
58  
59  
60

1  
2  
3 to the health service, social care providers and patients). Results will be reported as the  
4  
5 incremental net benefit and incremental cost-effectiveness ratios. Uncertainty will be captured  
6  
7 in the analyses through probabilistic sensitivity analysis and reported using cost-effectiveness  
8  
9 acceptability curves, showing the likelihood the intervention will be cost-effective over a range  
10  
11 of values of willingness-to-pay for specific outcomes.  
12  
13

### 14 15 **Planned Subgroup Analyses**

16  
17 Pre-specified subgroup analysis will include ICU patients to 1) adult vs. pediatric, 2) female vs.  
18  
19 male, 3) academic vs. community ICUs, 4) cardiovascular ICUs vs. medical/surgical ICUs, 5)  
20  
21 high volume vs. low volume centers (i.e., as per quartiles) 6) patients requiring acute RRT vs.  
22  
23 those on chronic dialysis. Adult, pediatric, female and male patients are fundamentally different  
24  
25 patient populations and deserve specific study.  
26  
27

28  
29 Cardiovascular ICU patients differ from general medical/surgical patients as often these  
30  
31 patients are immediately post-operative, have a specific timing of insult (i.e., cardiac surgery)  
32  
33 and hence have different pathophysiology related to their critical illness. It is important to  
34  
35 delineate academic vs. community ICUs as, for mechanically ventilated patients (i.e., another  
36  
37 form of critical life-sustaining therapy) with acute respiratory distress syndrome (ARDS),  
38  
39 mortality rates differ significantly.[19] Finally, higher ARDS hospital case volume has also  
40  
41 been associated with lowers ARDS hospital mortality and it will be important to determine if  
42  
43 this association is present in CRRT.[20] We will perform the above analyses for health  
44  
45 economic evaluations, patient and process of care measures to include our pre-specified  
46  
47 primary and secondary outcomes for each subgroup. Each analysis will be accompanied by a  
48  
49 test for interaction between treatment and subgroup to ascertain whether effects differ  
50  
51 significantly between subgroups.  
52  
53  
54  
55  
56  
57  
58  
59  
60

## Ethics Approval and Consent to Participate

This project is an evaluation of impact of a multi-faceted CRRT quality assurance and improvement program on patient outcomes and health care resource utilization in Alberta ICUs delivering CRRT. All diagnostic and management strategies are within standard of care and all data with relevance to the project are already routinely captured as part of standard patient care by means of machine specific data cards or clinical charting. No added trial-specific investigations or clinical documentation is required.

This evaluation was reviewed by the University of Alberta Health Research Ethics Board (HREB) (Pro00075274 January 22, 2020) and a waiver of consent was granted based on the premise this project represents health services implementation and evaluation compatible with a quality assurance and improvement initiative (see Appendix 3).

Any protocol modifications will be submitted to the appropriate relevant parties.

## Dissemination

The findings of QUALITY CRRT will directly inform and guide policy on establishing evidence-based best-practices guidelines for delivering CRRT in Alberta ICUs. In addition, establishing evidence-based benchmarks across the entire health care system will enable systematic evaluation of CRRT performance. These outcomes will help create a framework for the standardization of CRRT programs across Alberta and other jurisdictions providing CRRT. (Table 2).

Alberta's comprehensive ICU clinical information and analytics infrastructure (Connect Care, eClinical TRACER) will be leveraged to implement a CRRT Quality Dashboard, accessible to

1  
2  
3 all Alberta ICU practitioners. The dashboard will contain statistics on KPI benchmarks to  
4  
5 provide real-time feedback on individual ICUs performance in delivering CRRT.  
6  
7

8 A central website containing a summary of CRRT guidelines and best practices and a repository  
9  
10 of troubleshooting tools on attaining KPI benchmarks will be developed and made available to  
11  
12 all Alberta CRRT practitioners.  
13  
14

15 We are proposing to publish the study results. Further, this work will be presented at local,  
16  
17 provincial and national critical care and nephrology meetings. Finally, QUALITY CRRT will  
18  
19 serve as the basis for a broader program of work, DIALYZING WISELY, which will aim to  
20  
21 transform the fashion in which acute dialysis is conducted in Alberta.  
22  
23  
24  
25  
26  
27

## 28 **Discussion**

29  
30 The importance of the quality and management for critically ill patients with acute kidney injury  
31  
32 requiring CRRT has been previously recognized.[5, 6] Previous studies have focused on single  
33  
34 unit or individual hospital-level quality improvement and assurance interventions (Table 5).[14-  
35  
36 16] Griffin et al., first conducted such a quality improvement study at the University of Colorado  
37  
38 Hospital where they assessed the magnitude in variability in CRRT dosing. They followed  
39  
40 specific implementation that included optimizing their electronic medical record to calculate  
41  
42 CRRT dosing in real-time to then comment on dosing and provide guidance and education in  
43  
44 order to better adhere to national guidelines. This led to the doubling of the rate of appropriate  
45  
46 CRRT dosing, and reduction in variability.[14] Mottes et al., at the University of Cincinnati  
47  
48 Children's Hospital, created a 'CRRT Dashboard' which tracked important KPIs such as 'filter  
49  
50 life,' 'mean prescription dose,' and 'fluid balance,' and found that this platform provided a  
51  
52  
53  
54  
55  
56  
57  
58  
59  
60



1  
2  
3 significant means for measuring adherence to robust standards on the delivery of CRRT,  
4 specifically in the process of care.[15] Finally, most recently a group from the University of  
5  
6 Kentucky Medical Centre reported the development, implementation, and subsequent outcomes  
7  
8 associated with a quality assurance system to support the provision of CRRT in the ICU.[16]  
9  
10 This was the largest program to date, numbering 1185 adult patients on CRRT over a 34-month  
11  
12 period. Using the monitoring of evidence-based KPIs and targeted education, they doubled the  
13  
14 appropriate use of citrate-based anticoagulation, improved the appropriateness of CRRT-dosing,  
15  
16 increased filter life while decreasing machine alarms and maintaining similar CRRT duration and  
17  
18 patient mortality while reducing CRRT-costs. While these programs demonstrate that the  
19  
20 implementation of evidence-derived KPI-based CRRT quality assurance programs are effective  
21  
22 in improving the efficiency and quality of CRRT, none of these programs have sought to do this  
23  
24 on an entire healthcare systems level. QUALITY CRRT will build on the experience of these  
25  
26 programs in order to scale such a quality improvement and assurance initiative across a  
27  
28 provincial health system of ICUs which provide CRRT.  
29  
30  
31  
32  
33  
34  
35  
36  
37

### 38 **Strengths & Limitations**

39  
40 While QUALITY CRRT focuses on standardizing CRRT programs across an entire provincial  
41  
42 healthcare system by ensuring a robust framework is in place and the monitoring of CRRT  
43  
44 performance and delivery occurs, this is limited to only continuous RRT. Intermittent RRT can  
45  
46 also occur in the acute setting for critically ill patients in the ICU. Accordingly, the experience  
47  
48 and infrastructure realized in QUALITY CRRT will pave the work for additional critical care  
49  
50 nephrology programs aimed at improving all forms acute RRT (i.e., continuous and intermittent)  
51  
52 in the ICU.  
53  
54  
55  
56  
57  
58  
59  
60

### **Contributorship Statement**

SMB and OGR were responsible for the conception, design and planning of this study. ER assisted in the development of CRRT KPIs. VL and XW have assisted in creating the analysis plan and will work with interpretation the data. DO, NF and DZ assisted with manuscript preparation. All authors approved the final drafting of this manuscript.

### **Competing Interests**

Drs. SBM and OGR have received honoraria from Baxter Healthcare Inc.

The study sponsors had no role in protocol development, trial management or data analysis and reporting.

### **Funding**

QUALITY CRRT was supported by University of Alberta Hospital Fund grant number RES0040497 and Baxter Health Inc. Investigator Initiated Research grant number RES0044818.

## References:

1. Rewa O, Bagshaw SM: **Acute kidney injury-epidemiology, outcomes and economics.** *Nat Rev Nephrol* 2014, **10**(4):193-207.
2. Rewa O, Mottes T, Bagshaw SM: **Quality measures for acute kidney injury and continuous renal replacement therapy.** *Curr Opin Crit Care* 2015, **21**(6):490-499.
3. Hoste EA, Bagshaw SM, Bellomo R, Cely CM, Colman R, Cruz DN, Edipidis K, Forni LG, Gomersall CD, Govil D *et al*: **Epidemiology of acute kidney injury in critically ill patients: the multinational AKI-EPI study.** *Intensive Care Med* 2015, **41**(8):1411-1423.
4. Lau D, Pannu N, James MT, Hemmelgarn BR, Kieser TM, Meyer SR, Klarenbach S: **Costs and consequences of acute kidney injury after cardiac surgery: A cohort study.** *J Thorac Cardiovasc Surg* 2020.
5. Kashani K, Rosner MH, Haase M, Lewington AJP, O'Donoghue DJ, Wilson FP, Nadim MK, Silver SA, Zarbock A, Ostermann M *et al*: **Quality Improvement Goals for Acute Kidney Injury.** *Clin J Am Soc Nephrol* 2019, **14**(6):941-953.
6. Rewa OG, Tolwani A, Mottes T, Juncos LA, Ronco C, Kashani K, Rosner M, Haase M, Kellum J, Bagshaw SM: **Quality of care and safety measures of acute renal replacement therapy: Workgroup statements from the 22nd acute disease quality initiative (ADQI) consensus conference.** *J Crit Care* 2019, **54**:52-57.
7. Tseng J, Halbert RJ, Minissian N, Rodriguez H, Barathan S, Hain P, Alban RF: **Association of Standardization of Continuous Renal Replacement Therapy and High-Value Care: An Evidence-Based Approach.** *Standardization of Continuous Renal Replacement Therapy and High-Value Care Letters. JAMA Internal Medicine* 2018, **178**(4):572-573.
8. Connor MJ, Jr., Karakala N: **Continuous Renal Replacement Therapy: Reviewing Current Best Practice to Provide High-Quality Extracorporeal Therapy to Critically Ill Patients.** *Adv Chronic Kidney Dis* 2017, **24**(4):213-218.
9. Shen B, Xu J, Wang Y, Jiang W, Teng J, Ding X: **Continuous Renal Replacement Therapy Quality Control and Performance Measures.** *Contrib Nephrol* 2018, **194**:134-145.
10. Resar R, Griffin F, Haraden C, TW N: **Using Care Bundles to Improve Health Care Quality.** *IHI Innovation Series white paper* 2012.
11. Rosner MH: **Ensuring Quality of Care through Monitoring of Continuous Renal Replacement Therapies.** *Contrib Nephrol* 2018, **194**:126-133.
12. Rewa OG, Villeneuve PM, Lachance P, Eurich DT, Stelfox HT, Gibney RTN, Hartling L, Featherstone R, Bagshaw SM: **Quality indicators of continuous renal replacement therapy (CRRT) care in critically ill patients: a systematic review.** *Intensive Care Med* 2017, **43**(6):750-763.
13. Rewa OG, Eurich DT, Noel Gibney RT, Bagshaw SM: **A modified Delphi process to identify, rank and prioritize quality indicators for continuous renal replacement therapy (CRRT) care in critically ill patients.** *J Crit Care* 2018, **47**:145-152.
14. Griffin BR, Thomson A, Yoder M, Francis I, Ambruso S, Bregman A, Feller M, Johnson-Bortolotto S, King C, Bonnes D *et al*: **Continuous Renal Replacement Therapy Dosing in Critically Ill Patients: A Quality Improvement Initiative.** *Am J Kidney Dis* 2019, **74**(6):727-735.

- 1  
2  
3  
4  
5  
6  
7  
8  
9  
10  
11  
12  
13  
14  
15  
16  
17  
18  
19  
20  
21  
22  
23  
24  
25  
26  
27  
28  
29  
30  
31  
32  
33  
34  
35  
36  
37  
38  
39  
40  
41  
42  
43  
44  
45  
46  
47  
48  
49  
50  
51  
52  
53  
54  
55  
56  
57  
58  
59  
60
15. Mottes TA, Goldstein SL, Basu RK: **Process based quality improvement using a continuous renal replacement therapy dashboard.** *BMC Nephrol* 2019, **20**(1):17.
  16. Ruiz EF, Ortiz-Soriano VM, Talbott M, Klein BA, Thompson Bastin ML, Mayer KP, Price EB, Dorfman R, Adams BN, Fryman L *et al*: **Development, implementation and outcomes of a quality assurance system for the provision of continuous renal replacement therapy in the intensive care unit.** *Sci Rep* 2020, **10**(1):20616.
  17. Bowker SL, Stelfox HT, Bagshaw SM: **Critical Care Strategic Clinical Network: Information infrastructure ensures a learning health system.** *Cmaj* 2019, **191**(Suppl):S22-s23.
  18. Brundin-Mather R, Soo A, Zuege DJ, Niven DJ, Fiest K, Doig CJ, Zygun D, Boyd JM, Parsons Leigh J, Bagshaw SM *et al*: **Secondary EMR data for quality improvement and research: A comparison of manual and electronic data collection from an integrated critical care electronic medical record system.** *J Crit Care* 2018, **47**:295-301.
  19. Raymondos K, Dirks T, Quintel M, Molitoris U, Ahrens J, Dieck T, Johanning K, Henzler D, Rossaint R, Putensen C *et al*: **Outcome of acute respiratory distress syndrome in university and non-university hospitals in Germany.** *Crit Care* 2017, **21**(1):122.
  20. Ike JD, Kempker JA, Kramer MR, Martin GS: **The Association Between Acute Respiratory Distress Syndrome Hospital Case Volume and Mortality in a U.S. Cohort, 2002-2011.** *Critical care medicine* 2018, **46**(5):764-773.

**Table 1. Alberta ICUs Delivered CRRT**

| Site                                                   | City       | ICU Type        | Hospital Type | Beds |
|--------------------------------------------------------|------------|-----------------|---------------|------|
| University of Alberta Hospital General Systems ICU     | Edmonton   | Mixed           | Academic      | 32   |
| Mazankowski Alberta Heart Institute Cardiovascular ICU | Edmonton   | Cardiac surgery | Academic      | 24   |
| Mazankowski Alberta Heart Institute Cardiac ICU        | Edmonton   | Cardiac         | Academic      | 8    |
| Royal Alexandra Hospital ICU                           | Edmonton   | Mixed           | Academic      | 25   |
| Grey Nuns Hospital ICU                                 | Edmonton   | Mixed           | Community     | 8    |
| Misericordia Hospital                                  | Edmonton   | Mixed           | Community     | 10   |
| Sturgeon Hospital ICU                                  | Edmonton   | Mixed           | Community     | 5    |
| Stollery Children's Hospital Pediatric ICU             | Edmonton   | Mixed           | Academic      | 16   |
| Stollery Children's Hospital Pediatric Cardiac ICU     | Edmonton   | Cardiac         | Academic      | 16   |
| Foothills Medical Centre ICU                           | Calgary    | Mixed           | Academic      | 28   |
| Foothills Medical Centre Cardiovascular ICU            | Calgary    | Cardiac surgery | Academic      | 16   |
| Foothills Medical Centre Cardiac ICU                   | Calgary    | Cardiac         | Academic      | 18   |
| Peter Lougheed Centre ICU                              | Calgary    | Mixed           | Academic      | 18   |
| Rockyview General Hospital ICU                         | Calgary    | Mixed           | Community     | 10   |
| South Health Campus ICU                                | Calgary    | Mixed           | Community     | 10   |
| Chinook Regional Hospital ICU                          | Lethbridge | Mixed           | Regional      | 7    |
| Red Deer Regional Hospital ICU                         | Red Deer   | Mixed           | Regional      | 12   |
| Alberta Children's Hospital Pediatric ICU              | Calgary    | Mixed           | Academic      | 15   |

**Table 2. Standardized Elements of CRRT Programs**

| <b>Program Element</b> | <b>Operational Definition</b>                                                       | <b>Benchmark</b>                              |
|------------------------|-------------------------------------------------------------------------------------|-----------------------------------------------|
| CRRT Leadership        | Presence of both CRRT physician and clinical nurse educator                         | 100%                                          |
| CRRT Education         | Number of CRRT providers with training/<br>total number of CRRT providers           | 100%                                          |
| <b>Filter Life</b>     | Number of filters lasting 72 hours/<br>Total number of filters used                 | > 50% of filters                              |
| <b>Delivered Dose</b>  | Actual delivered dose in ml/Kg/h /<br>Prescribed dose in ml/Kg/h                    | > 85% of dose<br>and<br>between 25-30 ml/Kg/h |
| <b>Downtime</b>        | Time CRRT not running per day/<br>Each day of CRRT prescription                     | < 15%                                         |
| <b>Ultrafiltration</b> | Actual ultrafiltration achieve in ml/Kg/h/<br>Prescribed ultrafiltration in ml/Kg/h | >85% of prescription                          |
| <b>Access Alarms</b>   | Number of alarms recorded per machine per day of therapy                            | < 5 alarms                                    |
| Adverse Events         | Number of adverse events as per RLS per quarter                                     | 0 events                                      |
| ICU Mortality          | Patient survival to ICU discharge                                                   | > 50%                                         |
| Renal Recovery         | Number of patients still requiring RRT at 90-days                                   | < 10%                                         |

\*CRRT Program Elements are shaded from white to light grey to dark grey as per the Donabedian framework of *structure*, *process* and *outcome*. Specific CRRT KPIs are in bold. Benchmarks have been taken from our internal and external validation of the KPIs. Our primary outcome will measure the performance of specific CRRT process KPIs.

**Table 3. Components of the multi-faceted intervention and knowledge implementation strategy**

| Strategy           | Description                                                                                                                                                                                                                                                                                                                                                                                                                                                                                                                                                   |
|--------------------|---------------------------------------------------------------------------------------------------------------------------------------------------------------------------------------------------------------------------------------------------------------------------------------------------------------------------------------------------------------------------------------------------------------------------------------------------------------------------------------------------------------------------------------------------------------|
| Education          | <ul style="list-style-type: none"> <li>• Site grand rounds and inter-professional seminars</li> <li>• Monthly video/teleconferencing sessions</li> <li>• Site specific educational sessions by inter-professional content experts and local champions</li> <li>• Provide a summary of current guidelines and best practice</li> <li>• Development of website for repository of evidence supporting implementation including banked webinar of project</li> <li>• In-person or virtual visits with ICU leadership, champions and investigator teams</li> </ul> |
| Coaching           | <ul style="list-style-type: none"> <li>• Provide ongoing resources for interpretation of KPI reports</li> <li>• Common troubleshooting advice cards</li> <li>• Provide clinical decision support resources</li> </ul>                                                                                                                                                                                                                                                                                                                                         |
| Audit and Feedback | <ul style="list-style-type: none"> <li>• Baseline and monthly reports of process of care indicators of implementation of the intervention</li> <li>• Comparative performance relative to peer ICUs across province</li> <li>• Quarterly video/teleconferencing sessions to discuss provincial KPI reports</li> </ul>                                                                                                                                                                                                                                          |
| Reminders          | <ul style="list-style-type: none"> <li>• Promotional items (posters; bulletins)</li> <li>• Weekly electronic communication to local site champions to ensure ongoing review of KPI reports and access to additional resources</li> </ul>                                                                                                                                                                                                                                                                                                                      |

Table 4. Project Timeline

| Activity by Quarter                  | 2020    |         |         |         | 2021    |         |         |         | 2022    |         |         |         | 2023    |         |         |
|--------------------------------------|---------|---------|---------|---------|---------|---------|---------|---------|---------|---------|---------|---------|---------|---------|---------|
|                                      | 1       | 2       | 3       | 4       | 1       | 2       | 3       | 4       | 1       | 2       | 3       | 4       | 1       | 2       | 3       |
|                                      | Jan-Mar | Apr-Jun | Jul-Sep | Oct-Dec | Jan-Mar | Apr-Jun | Jul-Sep | Oct-Dec | Jan-Mar | Apr-Jun | Jul-Sep | Oct-Dec | Jan-Mar | Apr-Jun | Jul-Sep |
| <b>Approvals</b>                     |         |         |         |         |         |         |         |         |         |         |         |         |         |         |         |
| Ethics approval/renewal - HREB       | ■       |         |         |         | ■       |         |         |         | ■       |         |         |         | ■       |         |         |
| Ethics approval/renewal - CHREB      |         | ■       |         |         |         | ■       |         |         |         | ■       |         |         |         | ■       |         |
| CTA/Administrative approvals         | ■       |         |         |         |         |         |         |         |         |         |         |         |         |         |         |
| DDA – Edmonton/Calgary/Regional      |         | ■       |         |         |         |         |         |         |         |         |         |         |         |         |         |
| <b>Baseline phase</b>                |         |         |         |         |         |         |         |         |         |         |         |         |         |         |         |
| Recruit Executive/Steering committee |         |         | ■       | ■       |         |         |         |         |         |         |         |         |         |         |         |
| Conduct survey                       |         |         | ■       |         |         |         |         |         |         |         |         |         |         |         |         |
| Extract baseline data - UAH          |         |         | ■       |         |         |         |         |         |         |         |         |         |         |         |         |
| Extract baseline data – all sites    |         |         | ■       | ■       |         |         |         |         |         |         |         |         |         |         |         |
| Develop education strategies         |         |         | ■       | ■       | ■       | ■       | ■       |         |         |         |         |         |         |         |         |
| <b>Intervention phase</b>            |         |         |         |         |         |         |         |         |         |         |         |         |         |         |         |
| Initiate pilot GSICU                 |         |         |         |         |         | ■       |         |         |         |         |         |         |         |         |         |
| Initiate other sites                 |         |         |         |         |         | ■       | ■       | ■       | ■       |         |         |         |         |         |         |
| Implement education strategies       |         |         |         |         |         | ■       | ■       | ■       | ■       | ■       | ■       | ■       | ■       | ■       | ■       |
| CRRT KPI reporting                   |         |         |         |         |         | ■       | ■       | ■       | ■       | ■       | ■       | ■       | ■       | ■       | ■       |
| Protocol Manuscript                  |         |         |         |         |         | ■       | ■       | ■       | ■       |         |         |         |         |         |         |
| Extract intervention phase data      |         |         |         |         |         |         |         |         |         |         |         |         |         | ■       |         |
| Study Manuscript                     |         |         |         |         |         |         |         |         |         |         |         |         |         |         | ■       |



Table 5. Previous CRRT QI Initiatives

| Study                      | Setting                                                                                                                                                  | Sample Size                                                                                | KPI(s) studied                                                                                                                                                                                           | Intervention                                                                                                                                                                                                                                                                 | Outcomes                                                                                                                                                                                                                                                                                                                                                                                     |
|----------------------------|----------------------------------------------------------------------------------------------------------------------------------------------------------|--------------------------------------------------------------------------------------------|----------------------------------------------------------------------------------------------------------------------------------------------------------------------------------------------------------|------------------------------------------------------------------------------------------------------------------------------------------------------------------------------------------------------------------------------------------------------------------------------|----------------------------------------------------------------------------------------------------------------------------------------------------------------------------------------------------------------------------------------------------------------------------------------------------------------------------------------------------------------------------------------------|
| <b>Griffin et al. 2019</b> | <ul style="list-style-type: none"> <li>Single center</li> <li>Adult</li> <li>Medical/Surgical</li> <li>Nephrology prescription</li> </ul>                | <ul style="list-style-type: none"> <li>837 CRRT treatment sessions</li> </ul>              | <ul style="list-style-type: none"> <li>Delivered dose</li> </ul>                                                                                                                                         | <ul style="list-style-type: none"> <li>Stakeholder engagement</li> <li>Modification to EMR</li> <li>Training of ICU nurses</li> <li>Standardization of protocol</li> <li>Improved documentation</li> <li>Modification of order sets</li> <li>Result dissemination</li> </ul> | <ul style="list-style-type: none"> <li>Increased in treatments achieving dose (66.3% vs. 33.3%, p&lt;0.001)</li> <li>Decline in under-dose treatments (11.7% vs. 20.7%, p&lt;0.001)</li> <li>Decline in over-dosed treatments (22% vs. 46%, p&lt;0.001)</li> </ul>                                                                                                                           |
| <b>Mottes et al. 2019</b>  | <ul style="list-style-type: none"> <li>Single center</li> <li>Pediatric</li> <li>Newborn, cardiac, pediatric</li> <li>Nephrology prescription</li> </ul> | <ul style="list-style-type: none"> <li>184 patients</li> <li>2090 patient days</li> </ul>  | <ul style="list-style-type: none"> <li>Filter life</li> <li>Unplanned filter changes</li> <li>Prescribed effluent dose</li> <li>Delivered vs. prescribed effluent dose</li> <li>Fluid balance</li> </ul> | <ul style="list-style-type: none"> <li>Development of CRRT quality dashboard</li> <li>Provided targeted provider based CRRT education</li> </ul>                                                                                                                             | <ul style="list-style-type: none"> <li>Mean filter life increase from 50 to 56 hours</li> <li>Unplanned filter change 33% to 15%</li> <li>Mean delivered dose increased from 2400ml/hr/1.73m<sup>2</sup> to 2845ml/hr/1.73m<sup>2</sup></li> <li>Delivered time increased from 81.1% to 92.7%</li> <li>Increase in achievement of daily desired fluid balance from 69.2% to 83.3%</li> </ul> |
| <b>Ruiz et al. 2020</b>    | <ul style="list-style-type: none"> <li>Single center</li> <li>Adult</li> <li>Medical/Surgical</li> <li>Nephrology prescription</li> </ul>                | <ul style="list-style-type: none"> <li>1185 patients</li> <li>7420 patient-days</li> </ul> | <ul style="list-style-type: none"> <li>CRRT modality</li> <li>Anticoagulation</li> <li>Delivered dose</li> <li>Delivered/Prescribed dose</li> <li>Filter life</li> <li>CRRT access alarms</li> </ul>     | <ul style="list-style-type: none"> <li>Assembly of multidisciplinary team</li> <li>Standardization of CRRT protocol</li> <li>Improvement of CRRT charting</li> <li>Report of CRRT QI metrics</li> <li>Education to clinicians and ICU nurses</li> </ul>                      | <ul style="list-style-type: none"> <li>Increase in CVVHDF use (92.4% to 100%, p&lt;0.001)</li> <li>Increase in RCA use (23.1% to 39.5%, p&lt;0.001)</li> <li>Improved filter life (26 to 31.2h, p=0.02)</li> <li>Decrease in access alarms (2.95 to 1.68/d, p=0.02)</li> </ul>                                                                                                               |

# Reporting checklist for protocol of a clinical trial.

Based on the SPIRIT guidelines.

## Instructions to authors

Complete this checklist by entering the page numbers from your manuscript where readers will find each of the items listed below.

Your article may not currently address all the items on the checklist. Please modify your text to include the missing information. If you are certain that an item does not apply, please write "n/a" and provide a short explanation.

Upload your completed checklist as an extra file when you submit to a journal.

In your methods section, say that you used the SPIRIT reporting guidelines, and cite them as:

Chan A-W, Tetzlaff JM, Gøtzsche PC, Altman DG, Mann H, Berlin J, Dickersin K, Hróbjartsson A, Schulz KF, Parulekar WR, Krleža-Jerić K, Laupacis A, Moher D. SPIRIT 2013 Explanation and Elaboration: Guidance for protocols of clinical trials. *BMJ*. 2013;346:e7586

|                                             |                     | Reporting Item                                                                                               | Page Number |
|---------------------------------------------|---------------------|--------------------------------------------------------------------------------------------------------------|-------------|
| <b>Administrative information</b>           |                     |                                                                                                              |             |
| Title                                       | <a href="#">#1</a>  | Descriptive title identifying the study design, population, interventions, and, if applicable, trial acronym | 1           |
| Trial registration                          | <a href="#">#2a</a> | Trial identifier and registry name. If not yet registered, name of intended registry                         | 1           |
| Trial registration: data set                | <a href="#">#2b</a> | All items from the World Health Organization Trial Registration Data Set                                     | 1           |
| Protocol version                            | <a href="#">#3</a>  | Date and version identifier                                                                                  | 1           |
| Funding                                     | <a href="#">#4</a>  | Sources and types of financial, material, and other support                                                  | 1           |
| Roles and responsibilities: contributorship | <a href="#">#5a</a> | Names, affiliations, and roles of protocol contributors                                                      | 1, 19       |

|    |                           |                     |                                                          |     |
|----|---------------------------|---------------------|----------------------------------------------------------|-----|
| 1  | Roles and                 | <a href="#">#5b</a> | Name and contact information for the trial sponsor       | 1   |
| 2  | responsibilities:         |                     |                                                          |     |
| 3  | sponsor contact           |                     |                                                          |     |
| 4  | information               |                     |                                                          |     |
| 5  |                           |                     |                                                          |     |
| 6  |                           |                     |                                                          |     |
| 7  |                           |                     |                                                          |     |
| 8  | Roles and                 | <a href="#">#5c</a> | Role of study sponsor and funders, if any, in study      | 18  |
| 9  | responsibilities:         |                     | design; collection, management, analysis, and            |     |
| 10 | sponsor and funder        |                     | interpretation of data; writing of the report; and the   |     |
| 11 |                           |                     | decision to submit the report for publication, including |     |
| 12 |                           |                     | whether they will have ultimate authority over any of    |     |
| 13 |                           |                     | these activities                                         |     |
| 14 |                           |                     |                                                          |     |
| 15 |                           |                     |                                                          |     |
| 16 |                           |                     |                                                          |     |
| 17 | Roles and                 | <a href="#">#5d</a> | Composition, roles, and responsibilities of the          | 7   |
| 18 | responsibilities:         |                     | coordinating centre, steering committee, endpoint        |     |
| 19 | committees                |                     | adjudication committee, data management team, and        |     |
| 20 |                           |                     | other individuals or groups overseeing the trial, if     |     |
| 21 |                           |                     | applicable (see Item 21a for data monitoring committee)  |     |
| 22 |                           |                     |                                                          |     |
| 23 |                           |                     |                                                          |     |
| 24 |                           |                     |                                                          |     |
| 25 |                           |                     |                                                          |     |
| 26 | <b>Introduction</b>       |                     |                                                          |     |
| 27 |                           |                     |                                                          |     |
| 28 | Background and            | <a href="#">#6a</a> | Description of research question and justification for   | 4   |
| 29 | rationale                 |                     | undertaking the trial, including summary of relevant     |     |
| 30 |                           |                     | studies (published and unpublished) examining benefits   |     |
| 31 |                           |                     | and harms for each intervention                          |     |
| 32 |                           |                     |                                                          |     |
| 33 |                           |                     |                                                          |     |
| 34 |                           |                     |                                                          |     |
| 35 | Background and            | <a href="#">#6b</a> | Explanation for choice of comparators                    | 4   |
| 36 | rationale: choice of      |                     |                                                          |     |
| 37 | comparators               |                     |                                                          |     |
| 38 |                           |                     |                                                          |     |
| 39 |                           |                     |                                                          |     |
| 40 | Objectives                | <a href="#">#7</a>  | Specific objectives or hypotheses                        | 5,6 |
| 41 |                           |                     |                                                          |     |
| 42 |                           |                     |                                                          |     |
| 43 | Trial design              | <a href="#">#8</a>  | Description of trial design including type of trial (eg, | 6   |
| 44 |                           |                     | parallel group, crossover, factorial, single group),     |     |
| 45 |                           |                     | allocation ratio, and framework (eg, superiority,        |     |
| 46 |                           |                     | equivalence, non-inferiority, exploratory)               |     |
| 47 |                           |                     |                                                          |     |
| 48 |                           |                     |                                                          |     |
| 49 | <b>Methods:</b>           |                     |                                                          |     |
| 50 | <b>Participants,</b>      |                     |                                                          |     |
| 51 | <b>interventions, and</b> |                     |                                                          |     |
| 52 | <b>outcomes</b>           |                     |                                                          |     |
| 53 |                           |                     |                                                          |     |
| 54 |                           |                     |                                                          |     |
| 55 |                           |                     |                                                          |     |
| 56 | Study setting             | <a href="#">#9</a>  | Description of study settings (eg, community clinic,     | 6   |
| 57 |                           |                     | academic hospital) and list of countries where data will |     |
| 58 |                           |                     |                                                          |     |
| 59 |                           |                     |                                                          |     |
| 60 |                           |                     |                                                          |     |

|    |                      |                                                                              |       |
|----|----------------------|------------------------------------------------------------------------------|-------|
| 1  |                      | be collected. Reference to where list of study sites can                     |       |
| 2  |                      | be obtained                                                                  |       |
| 3  |                      |                                                                              |       |
| 4  | Eligibility criteria | <a href="#">#10</a> Inclusion and exclusion criteria for participants. If    | 7,8   |
| 5  |                      | applicable, eligibility criteria for study centres and                       |       |
| 6  |                      | individuals who will perform the interventions (eg,                          |       |
| 7  |                      | surgeons, psychotherapists)                                                  |       |
| 8  |                      |                                                                              |       |
| 9  |                      |                                                                              |       |
| 10 |                      |                                                                              |       |
| 11 | Interventions:       | <a href="#">#11a</a> Interventions for each group with sufficient detail to  | 8     |
| 12 | description          | allow replication, including how and when they will be                       |       |
| 13 |                      | administered                                                                 |       |
| 14 |                      |                                                                              |       |
| 15 |                      |                                                                              |       |
| 16 | Interventions:       | <a href="#">#11b</a> Criteria for discontinuing or modifying allocated       | n/a   |
| 17 | modifications        | interventions for a given trial participant (eg, drug dose                   |       |
| 18 |                      | change in response to harms, participant request, or                         |       |
| 19 |                      | improving / worsening disease)                                               |       |
| 20 |                      |                                                                              |       |
| 21 |                      |                                                                              |       |
| 22 |                      |                                                                              |       |
| 23 | Interventions:       | <a href="#">#11c</a> Strategies to improve adherence to intervention         | n/a   |
| 24 | adherence            | protocols, and any procedures for monitoring adherence                       |       |
| 25 |                      | (eg, drug tablet return; laboratory tests)                                   |       |
| 26 |                      |                                                                              |       |
| 27 |                      |                                                                              |       |
| 28 | Interventions:       | <a href="#">#11d</a> Relevant concomitant care and interventions that are    | 6,8,9 |
| 29 | concomitant care     | permitted or prohibited during the trial                                     |       |
| 30 |                      |                                                                              |       |
| 31 |                      |                                                                              |       |
| 32 | Outcomes             | <a href="#">#12</a> Primary, secondary, and other outcomes, including the    | 10,11 |
| 33 |                      | specific measurement variable (eg, systolic blood                            |       |
| 34 |                      | pressure), analysis metric (eg, change from baseline,                        |       |
| 35 |                      | final value, time to event), method of aggregation (eg,                      |       |
| 36 |                      | median, proportion), and time point for each outcome.                        |       |
| 37 |                      | Explanation of the clinical relevance of chosen efficacy                     |       |
| 38 |                      | and harm outcomes is strongly recommended                                    |       |
| 39 |                      |                                                                              |       |
| 40 |                      |                                                                              |       |
| 41 |                      |                                                                              |       |
| 42 |                      |                                                                              |       |
| 43 | Participant timeline | <a href="#">#13</a> Time schedule of enrolment, interventions (including any | 8,25  |
| 44 |                      | run-ins and washouts), assessments, and visits for                           |       |
| 45 |                      | participants. A schematic diagram is highly                                  |       |
| 46 |                      | recommended (see Figure)                                                     |       |
| 47 |                      |                                                                              |       |
| 48 |                      |                                                                              |       |
| 49 |                      |                                                                              |       |
| 50 | Sample size          | <a href="#">#14</a> Estimated number of participants needed to achieve       | 8     |
| 51 |                      | study objectives and how it was determined, including                        |       |
| 52 |                      | clinical and statistical assumptions supporting any                          |       |
| 53 |                      | sample size calculations                                                     |       |
| 54 |                      |                                                                              |       |
| 55 |                      |                                                                              |       |
| 56 |                      |                                                                              |       |
| 57 | Recruitment          | <a href="#">#15</a> Strategies for achieving adequate participant enrolment  | 7,8   |
| 58 |                      | to reach target sample size                                                  |       |
| 59 |                      |                                                                              |       |
| 60 |                      |                                                                              |       |

1 **Methods:**

2 **Assignment of**  
3 **interventions (for**  
4 **controlled trials)**  
5  
6

|    |                      |                      |                                                           |
|----|----------------------|----------------------|-----------------------------------------------------------|
| 7  |                      |                      |                                                           |
| 8  | Allocation: sequence | <a href="#">#16a</a> | Method of generating the allocation sequence (eg,         |
| 9  | generation           |                      | computer-generated random numbers), and list of any       |
| 10 |                      |                      | factors for stratification. To reduce predictability of a |
| 11 |                      |                      | random sequence, details of any planned restriction (eg,  |
| 12 |                      |                      | blocking) should be provided in a separate document       |
| 13 |                      |                      | that is unavailable to those who enrol participants or    |
| 14 |                      |                      | assign interventions                                      |
| 15 |                      |                      |                                                           |
| 16 |                      |                      |                                                           |
| 17 |                      |                      |                                                           |
| 18 |                      |                      |                                                           |
| 19 | Allocation           | <a href="#">#16b</a> | Mechanism of implementing the allocation sequence         |
| 20 | concealment          |                      | (eg, central telephone; sequentially numbered, opaque,    |
| 21 | mechanism            |                      | sealed envelopes), describing any steps to conceal the    |
| 22 |                      |                      | sequence until interventions are assigned                 |
| 23 |                      |                      |                                                           |
| 24 |                      |                      |                                                           |
| 25 |                      |                      |                                                           |
| 26 | Allocation:          | <a href="#">#16c</a> | Who will generate the allocation sequence, who will       |
| 27 | implementation       |                      | enrol participants, and who will assign participants to   |
| 28 |                      |                      | interventions                                             |
| 29 |                      |                      |                                                           |
| 30 |                      |                      |                                                           |
| 31 | Blinding (masking)   | <a href="#">#17a</a> | Who will be blinded after assignment to interventions     |
| 32 |                      |                      | (eg, trial participants, care providers, outcome          |
| 33 |                      |                      | assessors, data analysts), and how                        |
| 34 |                      |                      |                                                           |
| 35 |                      |                      |                                                           |
| 36 | Blinding (masking):  | <a href="#">#17b</a> | If blinded, circumstances under which unblinding is       |
| 37 | emergency unblinding |                      | permissible, and procedure for revealing a participant's  |
| 38 |                      |                      | allocated intervention during the trial                   |
| 39 |                      |                      |                                                           |
| 40 |                      |                      |                                                           |

41 **Methods: Data**  
42 **collection,**  
43 **management, and**  
44 **analysis**  
45  
46  
47

|    |                      |                      |                                                             |
|----|----------------------|----------------------|-------------------------------------------------------------|
| 48 | Data collection plan | <a href="#">#18a</a> | Plans for assessment and collection of outcome,             |
| 49 |                      |                      | baseline, and other trial data, including any related       |
| 50 |                      |                      | processes to promote data quality (eg, duplicate            |
| 51 |                      |                      | measurements, training of assessors) and a description      |
| 52 |                      |                      | of study instruments (eg, questionnaires, laboratory        |
| 53 |                      |                      | tests) along with their reliability and validity, if known. |
| 54 |                      |                      |                                                             |
| 55 |                      |                      |                                                             |
| 56 |                      |                      |                                                             |
| 57 |                      |                      |                                                             |
| 58 |                      |                      |                                                             |
| 59 |                      |                      |                                                             |
| 60 |                      |                      |                                                             |

Reference to where data collection forms can be found, if not in the protocol

|    |                            |                      |                                                             |
|----|----------------------------|----------------------|-------------------------------------------------------------|
| 1  |                            |                      |                                                             |
| 2  |                            |                      |                                                             |
| 3  |                            |                      |                                                             |
| 4  | Data collection plan:      | <a href="#">#18b</a> | Plans to promote participant retention and complete         |
| 5  | retention                  |                      | follow-up, including list of any outcome data to be         |
| 6  |                            |                      | collected for participants who discontinue or deviate       |
| 7  |                            |                      | from intervention protocols                                 |
| 8  |                            |                      |                                                             |
| 9  |                            |                      |                                                             |
| 10 | Data management            | <a href="#">#19</a>  | Plans for data entry, coding, security, and storage,        |
| 11 |                            |                      | including any related processes to promote data quality     |
| 12 |                            |                      | (eg, double data entry; range checks for data values).      |
| 13 |                            |                      | Reference to where details of data management               |
| 14 |                            |                      | procedures can be found, if not in the protocol             |
| 15 |                            |                      |                                                             |
| 16 |                            |                      |                                                             |
| 17 |                            |                      |                                                             |
| 18 |                            |                      |                                                             |
| 19 | Statistics: outcomes       | <a href="#">#20a</a> | Statistical methods for analysing primary and secondary     |
| 20 |                            |                      | outcomes. Reference to where other details of the           |
| 21 |                            |                      | statistical analysis plan can be found, if not in the       |
| 22 |                            |                      | protocol                                                    |
| 23 |                            |                      |                                                             |
| 24 |                            |                      |                                                             |
| 25 |                            |                      |                                                             |
| 26 | Statistics: additional     | <a href="#">#20b</a> | Methods for any additional analyses (eg, subgroup and       |
| 27 | analyses                   |                      | adjusted analyses)                                          |
| 28 |                            |                      |                                                             |
| 29 |                            |                      |                                                             |
| 30 | Statistics: analysis       | <a href="#">#20c</a> | Definition of analysis population relating to protocol non- |
| 31 | population and             |                      | adherence (eg, as randomised analysis), and any             |
| 32 | missing data               |                      | statistical methods to handle missing data (eg, multiple    |
| 33 |                            |                      | imputation)                                                 |
| 34 |                            |                      |                                                             |
| 35 |                            |                      |                                                             |
| 36 | <b>Methods: Monitoring</b> |                      |                                                             |
| 37 |                            |                      |                                                             |
| 38 |                            |                      |                                                             |
| 39 | Data monitoring:           | <a href="#">#21a</a> | Composition of data monitoring committee (DMC);             |
| 40 | formal committee           |                      | summary of its role and reporting structure; statement of   |
| 41 |                            |                      | whether it is independent from the sponsor and              |
| 42 |                            |                      | competing interests; and reference to where further         |
| 43 |                            |                      | details about its charter can be found, if not in the       |
| 44 |                            |                      | protocol. Alternatively, an explanation of why a DMC is     |
| 45 |                            |                      | not needed                                                  |
| 46 |                            |                      |                                                             |
| 47 |                            |                      |                                                             |
| 48 |                            |                      |                                                             |
| 49 |                            |                      |                                                             |
| 50 | Data monitoring:           | <a href="#">#21b</a> | Description of any interim analyses and stopping            |
| 51 | interim analysis           |                      | guidelines, including who will have access to these         |
| 52 |                            |                      | interim results and make the final decision to terminate    |
| 53 |                            |                      | the trial                                                   |
| 54 |                            |                      |                                                             |
| 55 |                            |                      |                                                             |
| 56 |                            |                      |                                                             |
| 57 | Harms                      | <a href="#">#22</a>  | Plans for collecting, assessing, reporting, and managing    |
| 58 |                            |                      | solicited and spontaneously reported adverse events         |
| 59 |                            |                      |                                                             |
| 60 |                            |                      |                                                             |

and other unintended effects of trial interventions or trial conduct

|    |                                      |                      |                                                                                                                                                                                                                                    |
|----|--------------------------------------|----------------------|------------------------------------------------------------------------------------------------------------------------------------------------------------------------------------------------------------------------------------|
| 1  |                                      |                      |                                                                                                                                                                                                                                    |
| 2  |                                      |                      |                                                                                                                                                                                                                                    |
| 3  |                                      |                      |                                                                                                                                                                                                                                    |
| 4  | Auditing                             | <a href="#">#23</a>  | Frequency and procedures for auditing trial conduct, if any, and whether the process will be independent from investigators and the sponsor                                                                                        |
| 5  |                                      |                      |                                                                                                                                                                                                                                    |
| 6  |                                      |                      |                                                                                                                                                                                                                                    |
| 7  |                                      |                      |                                                                                                                                                                                                                                    |
| 8  |                                      |                      |                                                                                                                                                                                                                                    |
| 9  | <b>Ethics and</b>                    |                      |                                                                                                                                                                                                                                    |
| 10 | <b>dissemination</b>                 |                      |                                                                                                                                                                                                                                    |
| 11 |                                      |                      |                                                                                                                                                                                                                                    |
| 12 |                                      |                      |                                                                                                                                                                                                                                    |
| 13 | Research ethics approval             | <a href="#">#24</a>  | Plans for seeking research ethics committee / institutional review board (REC / IRB) approval                                                                                                                                      |
| 14 |                                      |                      |                                                                                                                                                                                                                                    |
| 15 |                                      |                      |                                                                                                                                                                                                                                    |
| 16 |                                      |                      |                                                                                                                                                                                                                                    |
| 17 | Protocol amendments                  | <a href="#">#25</a>  | Plans for communicating important protocol modifications (eg, changes to eligibility criteria, outcomes, analyses) to relevant parties (eg, investigators, REC / IRBs, trial participants, trial registries, journals, regulators) |
| 18 |                                      |                      |                                                                                                                                                                                                                                    |
| 19 |                                      |                      |                                                                                                                                                                                                                                    |
| 20 |                                      |                      |                                                                                                                                                                                                                                    |
| 21 |                                      |                      |                                                                                                                                                                                                                                    |
| 22 |                                      |                      |                                                                                                                                                                                                                                    |
| 23 |                                      |                      |                                                                                                                                                                                                                                    |
| 24 |                                      |                      |                                                                                                                                                                                                                                    |
| 25 | Consent or assent                    | <a href="#">#26a</a> | Who will obtain informed consent or assent from potential trial participants or authorised surrogates, and how (see Item 32)                                                                                                       |
| 26 |                                      |                      |                                                                                                                                                                                                                                    |
| 27 |                                      |                      |                                                                                                                                                                                                                                    |
| 28 |                                      |                      |                                                                                                                                                                                                                                    |
| 29 |                                      |                      |                                                                                                                                                                                                                                    |
| 30 | Consent or assent: ancillary studies | <a href="#">#26b</a> | Additional consent provisions for collection and use of participant data and biological specimens in ancillary studies, if applicable                                                                                              |
| 31 |                                      |                      |                                                                                                                                                                                                                                    |
| 32 |                                      |                      |                                                                                                                                                                                                                                    |
| 33 |                                      |                      |                                                                                                                                                                                                                                    |
| 34 |                                      |                      |                                                                                                                                                                                                                                    |
| 35 |                                      |                      |                                                                                                                                                                                                                                    |
| 36 | Confidentiality                      | <a href="#">#27</a>  | How personal information about potential and enrolled participants will be collected, shared, and maintained in order to protect confidentiality before, during, and after the trial                                               |
| 37 |                                      |                      |                                                                                                                                                                                                                                    |
| 38 |                                      |                      |                                                                                                                                                                                                                                    |
| 39 |                                      |                      |                                                                                                                                                                                                                                    |
| 40 |                                      |                      |                                                                                                                                                                                                                                    |
| 41 |                                      |                      |                                                                                                                                                                                                                                    |
| 42 |                                      |                      |                                                                                                                                                                                                                                    |
| 43 | Declaration of interests             | <a href="#">#28</a>  | Financial and other competing interests for principal investigators for the overall trial and each study site                                                                                                                      |
| 44 |                                      |                      |                                                                                                                                                                                                                                    |
| 45 |                                      |                      |                                                                                                                                                                                                                                    |
| 46 |                                      |                      |                                                                                                                                                                                                                                    |
| 47 | Data access                          | <a href="#">#29</a>  | Statement of who will have access to the final trial dataset, and disclosure of contractual agreements that limit such access for investigators                                                                                    |
| 48 |                                      |                      |                                                                                                                                                                                                                                    |
| 49 |                                      |                      |                                                                                                                                                                                                                                    |
| 50 |                                      |                      |                                                                                                                                                                                                                                    |
| 51 |                                      |                      |                                                                                                                                                                                                                                    |
| 52 | Ancillary and post trial care        | <a href="#">#30</a>  | Provisions, if any, for ancillary and post-trial care, and for compensation to those who suffer harm from trial participation                                                                                                      |
| 53 |                                      |                      |                                                                                                                                                                                                                                    |
| 54 |                                      |                      |                                                                                                                                                                                                                                    |
| 55 |                                      |                      |                                                                                                                                                                                                                                    |
| 56 |                                      |                      |                                                                                                                                                                                                                                    |
| 57 | Dissemination policy: trial results  | <a href="#">#31a</a> | Plans for investigators and sponsor to communicate trial results to participants, healthcare professionals, the                                                                                                                    |
| 58 |                                      |                      |                                                                                                                                                                                                                                    |
| 59 |                                      |                      |                                                                                                                                                                                                                                    |
| 60 |                                      |                      |                                                                                                                                                                                                                                    |

public, and other relevant groups (eg, via publication, reporting in results databases, or other data sharing arrangements), including any publication restrictions

|    |                       |                      |                                                           |
|----|-----------------------|----------------------|-----------------------------------------------------------|
| 1  |                       |                      |                                                           |
| 2  |                       |                      |                                                           |
| 3  |                       |                      |                                                           |
| 4  |                       |                      |                                                           |
| 5  | Dissemination policy: | <a href="#">#31b</a> | Authorship eligibility guidelines and any intended use of |
| 6  | authorship            |                      | professional writers                                      |
| 7  |                       |                      |                                                           |
| 8  |                       |                      |                                                           |
| 9  | Dissemination policy: | <a href="#">#31c</a> | Plans, if any, for granting public access to the full     |
| 10 | reproducible research |                      | protocol, participant-level dataset, and statistical code |
| 11 |                       |                      |                                                           |
| 12 |                       |                      |                                                           |

## 13 Appendices

|    |                      |                     |                                                               |
|----|----------------------|---------------------|---------------------------------------------------------------|
| 14 |                      |                     |                                                               |
| 15 | Informed consent     | <a href="#">#32</a> | Model consent form and other related documentation            |
| 16 | materials            |                     | given to participants and authorised surrogates               |
| 17 |                      |                     |                                                               |
| 18 |                      |                     |                                                               |
| 19 | Biological specimens | <a href="#">#33</a> | Plans for collection, laboratory evaluation, and storage      |
| 20 |                      |                     | of biological specimens for genetic or molecular analysis     |
| 21 |                      |                     | in the current trial and for future use in ancillary studies, |
| 22 |                      |                     | if applicable                                                 |
| 23 |                      |                     |                                                               |
| 24 |                      |                     |                                                               |
| 25 |                      |                     |                                                               |

26 The SPIRIT Explanation and Elaboration paper is distributed under the terms of the Creative  
 27 Commons Attribution License CC-BY-NC. This checklist was completed on 16. June 2021 using  
 28 <https://www.goodreports.org/>, a tool made by the [EQUATOR Network](#) in collaboration with  
 29 [Penelope.ai](#)  
 30  
 31  
 32  
 33  
 34  
 35  
 36  
 37  
 38  
 39  
 40  
 41  
 42  
 43  
 44  
 45  
 46  
 47  
 48  
 49  
 50  
 51  
 52  
 53  
 54  
 55  
 56  
 57  
 58  
 59  
 60



## Appendix 2. List of data variables

| Data Variable                                                                                                                                                                                                                                       | Data source       | Description           |
|-----------------------------------------------------------------------------------------------------------------------------------------------------------------------------------------------------------------------------------------------------|-------------------|-----------------------|
| ICU location                                                                                                                                                                                                                                        | TRACER/Enterprise | admission ICU         |
| Age                                                                                                                                                                                                                                                 | TRACER/Enterprise | years                 |
| Sex                                                                                                                                                                                                                                                 | TRACER/Enterprise | M/F                   |
| BMI                                                                                                                                                                                                                                                 | TRACER/Enterprise | n/a                   |
| Date of Hospital Admission                                                                                                                                                                                                                          | TRACER/Enterprise | dd/mm/yyyy            |
| Date of ICU Admission                                                                                                                                                                                                                               | TRACER/Enterprise | dd/mm/yyyy            |
| Admission class                                                                                                                                                                                                                                     | TRACER/Enterprise | med/surg/neuro/trauma |
| ICU discharge location                                                                                                                                                                                                                              | TRACER/Enterprise | unit/hospital         |
| ICU Admission Diagnosis<br>CV<br>Respiratory<br>Gastrointestinal<br>Genitourinary/Renal<br>Endocrinological/Metabolic<br>Neurological<br>Trauma<br>Burn<br>Sepsis<br>Surgery                                                                        | TRACER/Enterprise | yes/no                |
| Co-morbidities<br>AIDS<br>Chronic Dialysis<br>Chronic Heart Failure<br>Respiratory Insufficiency<br>Cirrhosis<br>Diabetes Mellitus<br>Hepatic Failure<br>Immune Suppression<br>Leukemia<br>Lymphoma<br>Metastatic Cancer<br>Coronary Artery Disease | TRACER/Enterprise | yes/no                |
| Clinical Frailty Scale                                                                                                                                                                                                                              | TRACER/Enterprise | number                |
| APACHE II Score                                                                                                                                                                                                                                     | TRACER/Enterprise | number                |
| SOFA score                                                                                                                                                                                                                                          | TRACER/Enterprise | number                |
| Invasive/non-invasive ventilation                                                                                                                                                                                                                   | TRACER/Enterprise | hrs/min               |
| Vasopressors (include type)                                                                                                                                                                                                                         | TRACER/Enterprise | hrs/min               |
| CRRT Duration                                                                                                                                                                                                                                       | TRACER/Enterprise | hrs/min               |
| Cumulative daily fluid balance prior to RRT                                                                                                                                                                                                         | TRACER/Enterprise | mls                   |
| Creatinine, urea, pH, bicarbonate, potassium on day of RRT initiation                                                                                                                                                                               | TRACER/Enterprise | result                |

|                                                                          |                   |                       |
|--------------------------------------------------------------------------|-------------------|-----------------------|
| Renal Recovery at ICU Discharge                                          | TRACER/Enterprise | y/n - IHD             |
| Renal Recovery at Hospital Discharge                                     | NIS/PARIS/DIMR    | y/n - IHD/PD          |
| Renal Recovery at 90 days                                                | NIS/PARIS/DIMR    | y/n - IHD/PD          |
| ICU Mortality                                                            | TRACER/Enterprise | A/D                   |
| Hospital Mortality                                                       | TRACER/Enterprise | A/D                   |
| 90-day Mortality                                                         | DIMR              | A/D                   |
| ICU length of Stay                                                       | TRACER/Enterprise | days                  |
| Hospital Length of Stay                                                  | TRACER/Enterprise | days                  |
| Number of admissions to site                                             | TRACER/Enterprise | aggregate             |
| Patient days                                                             | TRACER/Enterprise | aggregate             |
| Ventilator days                                                          | TRACER/Enterprise | aggregate             |
| Dialysis days                                                            | TRACER/Enterprise | Days<br>CRRT/IHD/SLED |
| CRRT data                                                                | Baxter            | aggregate             |
| Filter life                                                              |                   | aggregate             |
| Reasons for retiring filters                                             |                   | aggregate             |
| Treatment time lost                                                      |                   | aggregate             |
| Prescription/dose                                                        |                   | aggregate             |
| Machine alarms                                                           |                   | aggregate             |
| Machine down times                                                       |                   | aggregate             |
| Type of coagulation                                                      |                   | aggregate             |
| Blood flow rates                                                         |                   | aggregate             |
| Filtration fraction                                                      |                   | aggregate             |
| Adverse events                                                           |                   | aggregate             |
| Economic data                                                            | DIMR              | aggregate             |
| Cost of filters, fluids, anticoagulation medications, dialysis catheters |                   | aggregate             |
| Patient life-years gained                                                |                   | aggregate             |
| Quality of life adjusted years (QUALY)                                   |                   | aggregate             |
| Re-hospitalizations                                                      |                   | aggregate             |
| Recurrence/chronic RRT                                                   |                   | aggregate             |
| Health care provider related costs                                       |                   | aggregate             |

308 Campus Tower  
 University of Alberta, Edmonton, AB T6G 1K8  
 p. 780.492.9724 (Biomedical Panel)  
 p. 780.492.0302 (Health Panel)  
 p. 780.492.0459

Approval Form

1  
2  
3  
4  
5  
6  
7  
8  
9  
10  
11  
12  
13  
14  
15  
16  
17  
18  
19  
20  
21  
22  
23  
24  
25  
26  
27  
28  
29  
30  
31  
32  
33  
34  
35  
36  
37  
38  
39  
40  
41  
42  
43  
44  
45  
46  
47  
48  
49  
50  
51  
52  
53  
54  
55  
56  
57  
58  
59  
60

Date: January 22, 2020  
 Study ID: Pro00075274  
 Principal Investigator: Oleksa Rewa  
 Study Title: Improving the quality of the performance and delivery of CRRT to critically ill patients in Alberta  
 Approval Expiry Date: Thursday, January 21, 2021  
 Sponsor/Funding Agency: Baxter Healthcare Inc  
 Sponsor/Funding Agency: University Hospital Foundation UHF

| Project ID                      | Project Title                                          | Speed Code | Other Information |
|---------------------------------|--------------------------------------------------------|------------|-------------------|
| <a href="#">View</a> RES0044818 | Development of a CRRT Quality Dashboard (QUALITY CRRT) |            | Baxter Healthcare |
| <a href="#">View</a> RES0040497 | QUALITY ICU                                            | ZAAIH      | UHF - Kaye Fund   |

Thank you for submitting the above study to the Health Research Ethics Board - Health Panel. Your application, including the following, has been reviewed and approved on behalf of the committee;

- Quality CRRT Survey (1/22/2020)
- Items to Be Included in Medical Record Review (1/22/2020)
- Quality CRRT Protocol (11/26/2020)

The Health Research Ethics Board assessed all matters required by section 50(1)(a) of the Health Information Act. It has been determined that a portion of the research described in the ethics application is retrospective review for which consent for access to personally identifiable health information would not be reasonable, feasible or practical. Consent therefore is not required for access to personally identifiable health information described in the ethics application. In order to comply with the Health Information Act, a copy of the approval form is being sent to the Office of the Information and Privacy Commissioner.

Any proposed changes to the study must be submitted to the REB for approval prior to implementation. A renewal report must be submitted next year prior to the expiry of this approval if your study still requires ethics approval. If you do not renew on or before the renewal expiry date ( Thursday, January 21, 2021), you will have to re-submit an ethics application.

Approval by the Health Research Ethics Board does not encompass authorization to access the patients, staff or resources of Alberta Health Services or other local health care institutions for the purposes of the research. Enquiries regarding Alberta Health approvals should be directed to (780) 407-6041. Enquiries regarding Covenant Health approvals should be directed to (780) 735-2274.

Sincerely,  
 Anthony S. Joyce, PhD.  
 Chair, Health Research Ethics Board - Health Panel

Note: This correspondence includes an electronic signature (validation and approval via an online system).

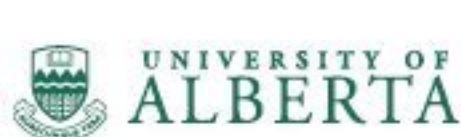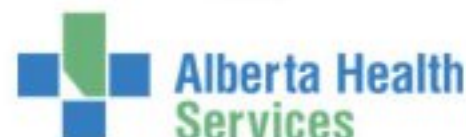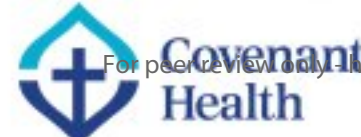

Supplement: bmjopen-2021-054583.draft_revisions.pdf [file bmjopen-2021-054583.draft_revisions.pdf]
