# Supplementary material for: Improving the quality of the performance and delivery of continuous renal replacement therapy (CRRT) to critically ill patients across a healthcare system: QUALITY CRRT: a study protocol
Source: HighWire-hosted journal article supplement (doi:10.1136/bmjopen-2021-054583), 2022-02-01
Supplement: bmjopen-2021-054583supp002_data_supplement.pdf [file bmjopen-2021-054583supp002_data_supplement.pdf]

**Appendix 2. List of data variables**

| <b>Data Variable</b>                                                                                                                                                                                                                                | <b>Data source</b> | <b>Description</b>    |
|-----------------------------------------------------------------------------------------------------------------------------------------------------------------------------------------------------------------------------------------------------|--------------------|-----------------------|
| ICU location                                                                                                                                                                                                                                        | TRACER/Enterprise  | admission ICU         |
| Age                                                                                                                                                                                                                                                 | TRACER/Enterprise  | years                 |
| Sex                                                                                                                                                                                                                                                 | TRACER/Enterprise  | M/F                   |
| BMI                                                                                                                                                                                                                                                 | TRACER/Enterprise  | n/a                   |
| Date of Hospital Admission                                                                                                                                                                                                                          | TRACER/Enterprise  | dd/mm/yyyy            |
| Date of ICU Admission                                                                                                                                                                                                                               | TRACER/Enterprise  | dd/mm/yyyy            |
| Admission class                                                                                                                                                                                                                                     | TRACER/Enterprise  | med/surg/neuro/trauma |
| ICU discharge location                                                                                                                                                                                                                              | TRACER/Enterprise  | unit/hospital         |
| ICU Admission Diagnosis<br>CV<br>Respiratory<br>Gastrointestinal<br>Genitourinary/Renal<br>Endocrinological/Metabolic<br>Neurological<br>Trauma<br>Burn<br>Sepsis<br>Surgery                                                                        | TRACER/Enterprise  | yes/no                |
| Co-morbidities<br>AIDS<br>Chronic Dialysis<br>Chronic Heart Failure<br>Respiratory Insufficiency<br>Cirrhosis<br>Diabetes Mellitus<br>Hepatic Failure<br>Immune Suppression<br>Leukemia<br>Lymphoma<br>Metastatic Cancer<br>Coronary Artery Disease | TRACER/Enterprise  | yes/no                |
| Clinical Frailty Scale                                                                                                                                                                                                                              | TRACER/Enterprise  | number                |
| APACHE II Score                                                                                                                                                                                                                                     | TRACER/Enterprise  | number                |
| SOFA score                                                                                                                                                                                                                                          | TRACER/Enterprise  | number                |
| Invasive/non-invasive ventilation                                                                                                                                                                                                                   | TRACER/Enterprise  | hrs/min               |
| Vasopressors (include type)                                                                                                                                                                                                                         | TRACER/Enterprise  | hrs/min               |
| CRRT Duration                                                                                                                                                                                                                                       | TRACER/Enterprise  | hrs/min               |
| Cumulative daily fluid balance prior to RRT                                                                                                                                                                                                         | TRACER/Enterprise  | mls                   |
| Creatinine, urea, pH, bicarbonate, potassium on day of RRT initiation                                                                                                                                                                               | TRACER/Enterprise  | result                |

|                                                                          |                   |                       |
|--------------------------------------------------------------------------|-------------------|-----------------------|
| Renal Recovery at ICU Discharge                                          | TRACER/Enterprise | y/n - IHD             |
| Renal Recovery at Hospital Discharge                                     | NIS/PARIS/DIMR    | y/n - IHD/PD          |
| Renal Recovery at 90 days                                                | NIS/PARIS/DIMR    | y/n - IHD/PD          |
| ICU Mortality                                                            | TRACER/Enterprise | A/D                   |
| Hospital Mortality                                                       | TRACER/Enterprise | A/D                   |
| 90-day Mortality                                                         | DIMR              | A/D                   |
| ICU length of Stay                                                       | TRACER/Enterprise | days                  |
| Hospital Length of Stay                                                  | TRACER/Enterprise | days                  |
| Number of admissions to site                                             | TRACER/Enterprise | aggregate             |
| Patient days                                                             | TRACER/Enterprise | aggregate             |
| Ventilator days                                                          | TRACER/Enterprise | aggregate             |
| Dialysis days                                                            | TRACER/Enterprise | Days<br>CRRT/IHD/SLED |
| CRRT data                                                                | Baxter            | aggregate             |
| Filter life                                                              |                   | aggregate             |
| Reasons for retiring filters                                             |                   | aggregate             |
| Treatment time lost                                                      |                   | aggregate             |
| Prescription/dose                                                        |                   | aggregate             |
| Machine alarms                                                           |                   | aggregate             |
| Machine down times                                                       |                   | aggregate             |
| Type of coagulation                                                      |                   | aggregate             |
| Blood flow rates                                                         |                   | aggregate             |
| Filtration fraction                                                      |                   | aggregate             |
| Adverse events                                                           |                   | aggregate             |
| Economic data                                                            | DIMR              | aggregate             |
| Cost of filters, fluids, anticoagulation medications, dialysis catheters |                   | aggregate             |
| Patient life-years gained                                                |                   | aggregate             |
| Quality of life adjusted years (QUALY)                                   |                   | aggregate             |
| Re-hospitalizations                                                      |                   | aggregate             |
| Recurrence/chronic RRT                                                   |                   | aggregate             |
| Health care provider related costs                                       |                   | aggregate             |
