# Supplementary material for: Improving the quality of the performance and delivery of continuous renal replacement therapy (CRRT) to critically ill patients across a healthcare system: QUALITY CRRT: a study protocol
Source: HighWire-hosted journal article supplement (doi:10.1136/bmjopen-2021-054583), 2022-02-01
Supplement: bmjopen-2021-054583supp003_data_supplement.pdf [file bmjopen-2021-054583supp003_data_supplement.pdf]

## Health Research Ethics Board

308 Campus Tower  
University of Alberta, Edmonton, AB T6G 1K8  
p. 780.492.9724 (Biomedical Panel)  
p. 780.492.0302 (Health Panel)  
p. 780.492.0459

### Approval Form

Date: January 22, 2020  
Study ID: Pro00075274  
Principal Investigator: [Oleksa Rewa](#)  
Study Title: Improving the quality of the performance and delivery of CRRT to critically ill patients in Alberta  
Approval Expiry Date: Thursday, January 21, 2021  
Sponsor/Funding Agency: Baxter Healthcare Inc  
Sponsor/Funding Agency: University Hospital Foundation UHF

|                      | Project ID                      | Project Title                                          | Speed Code | Other Information |
|----------------------|---------------------------------|--------------------------------------------------------|------------|-------------------|
| RSO-Managed Funding: | <a href="#">View</a> RES0044818 | Development of a CRRT Quality Dashboard (QUALITY CRRT) |            | Baxter Healthcare |
|                      | <a href="#">View</a> RES0040497 | QUALITY ICU                                            | ZAAIH      | UHF - Kaye Fund   |

Thank you for submitting the above study to the Health Research Ethics Board - Health Panel. Your application, including the following, has been reviewed and approved on behalf of the committee;

- Quality CRRT Survey (1/22/2020)
- Items to Be Included in Medical Record Review (1/22/2020)
- Quality CRRT Protocol (11/26/2020)

The Health Research Ethics Board assessed all matters required by section 50(1)(a) of the Health Information Act. It has been determined that a portion of the research described in the ethics application is retrospective review for which consent for access to personally identifiable health information would not be reasonable, feasible or practical. Consent therefore is not required for access to personally identifiable health information described in the ethics application. In order to comply with the Health Information Act, a copy of the approval form is being sent to the Office of the Information and Privacy Commissioner.

Any proposed changes to the study must be submitted to the REB for approval prior to implementation. A renewal report must be submitted next year prior to the expiry of this approval if your study still requires ethics approval. If you do not renew on or before the renewal expiry date ( Thursday, January 21, 2021), you will have to re-submit an ethics application.

Approval by the Health Research Ethics Board does not encompass authorization to access the patients, staff or resources of Alberta Health Services or other local health care institutions for the purposes of the research. Enquiries regarding Alberta Health approvals should be directed to (780) 407-6041. Enquiries regarding Covenant Health approvals should be directed to (780) 735-2274.

Sincerely,

Anthony S. Joyce, PhD.  
Chair, Health Research Ethics Board - Health Panel

*Note: This correspondence includes an electronic signature (validation and approval via an online system).*
